# Inference, validation and predictions about statistics and propagation of cortical spiking in vivo

J. Wilting<sup>1</sup> & V. Priesemann<sup>1,2,\*</sup>

<sup>1</sup>Max-Planck-Institute for Dynamics and Self-Organization, Am Faßberg 17, 37077 Göttingen, Germany; <sup>2</sup>Bernstein-Center for Computational Neuroscience, Göttingen, Germany

\* [viola.priesemann@ds.mpg.de](mailto:viola.priesemann@ds.mpg.de)

**Electrophysiological recordings of spiking activity can only access a small fraction of all neurons simultaneously. This spatial subsampling has hindered characterizing even most basic properties of collective spiking in cortex. In particular, two contradictory hypotheses prevailed for over a decade: the first proposed an asynchronous irregular, the second a critical state. While distinguishing them is straightforward in models, we show that in experiments classical approaches fail to infer them correctly, because subsampling can bias measures as basic as the correlation strength. Deploying a novel, subsampling-invariant estimator, we find evidence that in vivo cortical dynamics clearly differs from asynchronous or critical dynamics, and instead occupies a narrow “reverberating” regime, consistently across multiple mammalian species and cortical areas. These results enabled us to predict cortical properties that are difficult or impossible to obtain experimentally, including responses to minimal perturbations, intrinsic network timescales, and the strength of external input compared to recurrent activation.**

## 1 Introduction

2 When investigating spiking activity in neuronal networks, only a tiny fraction of all neurons can  
3 be recorded experimentally with millisecond precision. Such spatial subsampling fundamentally  
4 limits virtually any recording and hinders inferences about the collective dynamics of cortical  
5 networks.<sup>1-4</sup> In fact, even some of the most basic characteristics of cortical network dynamics are  
6 not known with certainty, such as the population Fano factor, or the fraction of spikes generated  
7 internally versus those triggered by input.

8 In particular, two contradicting hypotheses to describe network dynamics have competed for  
9 more than a decade, and are the subjects of ongoing scientific debate: One hypothesis suggests  
10 that collective dynamics are “asynchronous irregular”<sup>5-7</sup> (AI), i.e. neurons spike independently  
11 of each other and in a Poisson manner, which may reflect a balanced state.<sup>8,9</sup> The other hy-  
12 pothesis proposes that neuronal networks operate at criticality<sup>10-17</sup> and thus in a particularly  
13 sensitive state close to a phase transition. These hypotheses have distinct implications for the  
14 coding strategy of the brain. The typical balanced state minimizes redundancy,<sup>18-22</sup> supports  
15 fast network responses,<sup>8</sup> and shows vanishing autocorrelation time ( $\tau \rightarrow 0$ ). In contrast, crit-  
16 icality in models optimizes performance in tasks that profit from extended reverberations of  
17 activity in the network,<sup>23-29</sup> because it is characterized by long-range correlations in space and  
18 time ( $\tau \rightarrow \infty$ ). It has been proposed that  $\tau$  reflects an integration window over past activity,  
19 thereby allowing brain networks to operate on specific timescales.<sup>30-33</sup> Timescales estimated  
20 from single neurons span hundreds of milliseconds,<sup>34</sup> but it is unclear how timescales of the full  
21 network can be inferred in the face of subsampling.

22 Surprisingly, there is experimental evidence for both AI and critical states in cortical net-  
23 works, although both states are clearly distinct. Evidence for the AI state is based on char-  
24 acteristics of single neuron spiking resembling a Poisson process, i.e. exponential inter spike  
25 interval (ISI) distributions and Fano factors  $F$  close to unity.<sup>35</sup> Moreover, spike count cross-  
26 correlations<sup>36,37</sup> are small. Evidence for criticality was typically obtained from a population  
27 perspective instead, and assessed neuronal avalanches, i.e. spatio-temporal clusters of activ-  
28 ity,<sup>1,10,38-41</sup> whose sizes are expected to be power-law distributed if networks are critical.<sup>42</sup> Devi-  
29 ations from power-laws, typically observed for spiking activity in awake animals,<sup>2,3,43,44</sup> were at-  
30 tributed to subsampling effects.<sup>1-4,45-47</sup> Hence, different analysis approaches provided evidence  
31 for one or the other dynamical state's dominance.

32 We rely on a classic approach to probe the dynamical states of a system at steady state,  
33 namely applying minimal perturbations. Studying how perturbations cascade through a sys-  
34 tem enables the inference of numerous system properties. London and colleagues applied such  
35 a perturbation framework and estimated that one average  $m = 28$  additional postsynaptic  
36 spikes are triggered by one extra spike in a presynaptic neuron from intracellular recordings.<sup>48</sup>  
37 From their complementary extracellular spike recordings, one can equally well estimate  $m \approx$   
38  $0.04 \text{ Hz/neuron} \cdot 10 \text{ ms} \cdot k = 0.6$ : in the 10 ms subsequent to the perturbation, an increase  
39 of 0.04 Hz is observed for each neuron. Assuming that this 10 ms is an upper bound to di-  
40 rectly activate any of the  $k \approx 1500$  directly connected neurons, one obtains as an upper bound  
41  $m \approx 0.04 \text{ Hz/neuron} \cdot 10 \text{ ms} \cdot k = 0.6$ . This vast range for estimates of  $m$  arises largely be-  
42 cause such inferences are heavily influenced by subsampling. We here build on a subsampling-  
43 invariant approach presented in a companion study,<sup>49</sup> which allows us to resolve questions sur-  
44 rounding the contradictory results on cortical dynamics: (i) we establish an analytically tractable  
45 minimal model for *in vivo* like activity, which can interpolate from AI to critical dynamics; (ii)  
46 we estimate the dynamical state of cortical activity based on a novel, subsampling-invariant es-  
47 timator;<sup>49</sup> (iii) we predict a number of network dynamical properties, which are experimentally  
48 accessible and allow to validate our approach; (iv) we predict a number of yet unknown net-  
49 work properties, including  $m$ , the expected number of spikes triggered by one additional spike,  
50 the emergent network timescale  $\tau$ , the distribution of the total number of spikes triggered by  
51 a single extra action potential, and the fraction of activation that can be attributed to afferent  
52 external input to a cortical network.

## 53 **Material and Methods**

### 54 **Minimal model of spike propagation**

55 To gain an intuitive understanding of our mathematical approach, make a thought experiment  
56 in your favorite spiking network: apply one additional spike to an excitatory neuron, in analogy  
57 to the approach by London and colleagues<sup>48</sup>. How does the network respond to that perturba-  
58 tion? As a first order approximation, one quantifies the number of spikes that are triggered by  
59 this perturbation *additionally* in all postsynaptic neurons. This number may vary from trial to  
60 trial, depending on the membrane potential of the postsynaptic neurons; however, what inter-  
61 ests us most is  $m$ , the *mean number of spikes triggered by the one extra spike*. Taking a mean-field  
62 approximation and assuming that the perturbation indeed is small, any of these triggered spikes  
63 in turn trigger spikes in their postsynaptic neurons in a similar manner, and thereby the pertur-  
64 bation may cascade through the system. Mathematically, such cascades can be described by a  
65 branching process.<sup>50-52</sup>

66 In the next step, assume that perturbations are started continuously at rate  $h$ , for example  
67 through afferent input from other brain areas or sensory modalities. As neurons presumably  
68 do not distinguish whether a postsynaptic potential was elicited from a neuron from within the  
69 network, or from afferent input, all spikes are assumed to have on average the same impact  
70 on the network dynamics. Together, this leads to the mathematical framework of a branching

71 network,<sup>2,3,10,24,45</sup> which can generate dynamics spanning AI and critical states depending on the  
72 input,<sup>53</sup> and hence is well suited to probe network dynamics *in vivo* (see Supp. 1 for details). Most  
73 importantly, this framework allows to infer  $m$  and other properties from the ongoing activity  
74 proper, because one treats any single spike as a minimal perturbation on the background activity  
75 of the network. Mathematical approaches to infer  $m$  are long known if the full network is  
76 sampled.<sup>54,55</sup> Under subsampling, however, it is the novel estimator described in<sup>49</sup> that for the  
77 first time allows an unbiased inference of  $m$ , even if only a tiny fraction of neurons is sampled.  
78 After inferring  $m$ , a number of quantities can be analytically derived, and others can be obtained  
79 by simulating a mean-field spiking model, which is constrained by the experimentally measured  
80  $m$  and the spike rate.

81 The framework of branching networks can be interpreted as a stochastic description of spike  
82 propagation on networks, as outlined above. It can alternatively be taken as a *strictly phe-*  
83 *nomenological* approximation to network dynamics that enables us to infer details of network  
84 *statistics* despite subsampling. Independent of the perspective, the dynamics of the network  
85 is mainly governed by  $m$  (Fig. 1a). If an action potential only rarely brings any postsynaptic  
86 neuron above threshold ( $m \gtrsim 0$ ), external perturbations quickly die out, and neurons spike in-  
87 dependently and irregularly, driven by external fluctuations  $h$ . In general, if one action potential  
88 causes less than one subsequent action potential on average ( $m < 1$ ), perturbations die out and  
89 the network converges to a stable distribution, with increasing fluctuations and variance the  
90 closer  $m$  is to unity. If  $m > 1$ , perturbations may grow infinitely, potentially leading to instabil-  
91 ity. The critical state ( $m = 1$ ) separates the stable (subcritical) from the unstable (supercritical)  
92 phase. When approaching this critical state from below, the expected size  $\langle s \rangle$  and duration  
93  $\langle d \rangle$  of individual cascades or avalanches diverge:  $\langle s \rangle \sim \frac{1}{m_c - m}$ . Therefore, especially close to  
94 criticality, a correct estimate of  $m$  is vital to assess the risk that the network develops large, po-  
95 tentially devastating cascades, which have been linked to epileptic seizures,<sup>56</sup> either generically  
96 or via a minor increase in  $m$ .

97 **Simulation.** We simulated a branching network model by mapping a branching process<sup>50</sup>  
98 (Supp. 1) onto a fully connected network of  $N = 10,000$  neurons.<sup>24</sup> An active neuron activated  
99 each of its  $k$  postsynaptic neurons with probability  $p = m/k$ . Here, the activated postsynaptic  
100 neurons were drawn randomly without replacement at each step, thereby avoiding that two  
101 different active neurons would both activate the same target neuron. Similar to the branching  
102 process, the branching network is critical for  $m = 1$  in the infinite size limit, and subcritical  
103 (supercritical) for  $m < 1$  ( $m > 1$ ). We modeled input to the network at rate  $h$  by Poisson  
104 activation of each neuron at rate  $h/N$ . Subsampling<sup>1</sup> was applied to the model by sampling the  
105 activity of  $n$  neurons only, which were selected randomly before the simulation, and neglecting  
106 the activity of all other neurons.

107 If not stated otherwise, simulations were run for  $L = 10^7$  time steps (corresponding to  
108  $\sim 11$  h). Confidence intervals were estimated according to<sup>49</sup> from  $B = 100$  realizations of the  
109 network, both for simulation and experiments.

110 The reverberating branching networks were defined to match the respective experimental  
111 recording in the number of sampled neurons  $n$ , mean activity  $\langle a_t \rangle$ , and branching ratio  $m$ .  
112 Exemplarily for the cat recording, which happened to represent the median  $\hat{m}$ , this yielded  
113  $m = \hat{m} = 0.98$ ,  $n = 50$ , and  $\langle a_t \rangle = 1.58$  per bin, from which  $h = 0.032 \cdot N$  follows. The corre-  
114 sponding AI and near-critical networks were matched in  $n$  and  $\langle a_t \rangle$ , but set up with branching  
115 ratios of  $m = 0$  or  $m = 0.9999$  respectively. For all networks, we chose a full network size of  
116  $N = 10^4$ .

117 In Figs. 2c, the reverberating branching network was also matched to the length of the cat  
118 recording of 295 s. To test for stationarity, the cat recordings and the reverberating branching  
119 network were split into 59 windows of 5 s each, before estimating  $m$  for each window. In Fig.  
120 1c, subcritical and critical branching networks with  $N = 10^4$  and  $\langle A_t \rangle = 100$  were simulated,

121 and  $n = 100$  units sampled.

## 122 Experiments

123 We evaluated spike population dynamics from recordings in rats, cats and monkeys. The rat  
124 experimental protocols were approved by the Institutional Animal Care and Use Committee of  
125 Rutgers University.<sup>57,58</sup> The cat experiments were performed in accordance with guidelines es-  
126 tablished by the Canadian Council for Animal Care.<sup>59</sup> The monkey experiments were performed  
127 according to the German Law for the Protection of Experimental Animals, and were approved by  
128 the Regierungspräsidium Darmstadt. The procedures also conformed to the regulations issued  
129 by the NIH and the Society for Neuroscience. The spike recordings from the rats and the cats  
130 were obtained from the NSF-funded CRCNS data sharing website.<sup>57–60</sup>

131 **Rat experiments.** In rats the spikes were recorded in CA1 of the right dorsal hippocampus  
132 during an open field task. We used the first two data sets of each recording group (ec013.527,  
133 ec013.528, ec014.277, ec014.333, ec015.041, ec015.047, ec016.397, ec016.430). The data-sets pro-  
134 vided sorted spikes from 4 shanks (ec013) or 8 shanks (ec014, ec015, ec016), with 31 (ec013), 64  
135 (ec014, ec015) or 55 (ec016) channels. We used both, spikes of single and multi units, because  
136 knowledge about the identity and the precise number of neurons is not required for the MR  
137 estimator. More details on the experimental procedure and the data-sets proper can be found  
138 in<sup>57,58</sup>.

139 **Cat experiments.** Spikes in cat visual cortex were recorded by Tim Blanche in the laboratory  
140 of Nicholas Swindale, University of British Columbia.<sup>59</sup> We used the data set pvc3, i.e. recordings  
141 of 50 sorted single units in area 18.<sup>60</sup> We used that part of the experiment in which no stimuli  
142 were presented, i.e., the spikes reflected spontaneous activity in the visual cortex of the anes-  
143 thetized cat. Because of potential non-stationarities at the beginning and end of the recording,  
144 we omitted data before 25 s and after 320 s of recording. Details on the experimental procedures  
145 and the data proper can be found in<sup>59,60</sup>.

146 **Monkey experiments.** The monkey data are the same as in<sup>3,61</sup>. In these experiments, spikes  
147 were recorded simultaneously from up to 16 single-ended micro-electrodes ( $\varnothing = 80 \mu\text{m}$ ) or  
148 tetrodes ( $\varnothing = 96 \mu\text{m}$ ) in lateral prefrontal cortex of three trained macaque monkeys (M1: 6 kg  
149 ♀; M2: 12 kg ♂; M3: 8 kg ♀). The electrodes had impedances between 0.2 and 1.2 M $\Omega$  at 1 kHz,  
150 and were arranged in a square grid with inter electrode distances of either 0.5 or 1.0 mm. The  
151 monkeys performed a visual short term memory task. The task and the experimental procedure  
152 is detailed in<sup>61</sup>. We analyzed spike data from 12 experimental sessions comprising almost 12.000  
153 trials (M1: 5 sessions; M2: 4 sessions; M3: 3 sessions). 6 out of 12 sessions were recorded with  
154 tetrodes. Spike sorting on the tetrode data was performed using a Bayesian optimal template  
155 matching approach as described in<sup>62</sup> using the “Spyke Viewer” software.<sup>63</sup> On the single elec-  
156 trode data, spikes were sorted with a multi-dimensional PCA method (Smart Spike Sorter by  
157 Nan-Hui Chen).

## 158 Analysis

159 **Temporal binning** For each recording, we collapsed the spike times of all recorded neurons  
160 into one single train of population spike counts  $a_t$ , where  $a_t$  denotes how many neurons spiked  
161 in the  $t^{\text{th}}$  time bin  $\Delta t$ . If not indicated otherwise, we used  $\Delta t = 4$  ms, reflecting the propagation  
162 time of spikes from one neuron to the next.

163 **Multistep regression estimation of  $\hat{m}$**  From these time series, we estimated  $\hat{m}$  using the MR  
164 estimator described in<sup>49</sup>. For  $k = 1, \dots, k_{\text{max}}$ , we calculated the linear regression slope  $r_k \Delta t$   
165 for the linear statistical dependence of  $a_{t+k}$  upon  $a_t$ . From these slopes, we estimated  $\hat{m}$  following  
166 the relation  $r_{\delta t} = b \cdot \hat{m}^{\delta t / \Delta t}$ , where  $b$  is an (unknown) parameter that depends on the higher  
167 moments of the underlying process and the degree of subsampling. However, for an estimation  
168 of  $m$  no further knowledge about  $b$  is required.

169 Throughout this study we chose  $k_{\max} = 2500$  (corresponding to 10 s) for the rat recordings,  
170  $k_{\max} = 150$  (600 ms) for the cat recording, and  $k_{\max} = 500$  (2000 ms) for the monkey recordings,  
171 assuring that  $k_{\max}$  was always in the order of multiple autocorrelation times.

172 In order to test for the applicability of a MR estimation, we used a set of conservative tests<sup>49</sup>  
173 and included only those time series, where the approximation by a branching network was con-  
174 sidered appropriate. For example, we excluded all recordings that showed an offset in the slopes  
175  $r_k$ , because this offset is, strictly speaking, not explained by a branching network and might  
176 indicate non-stationarities. Details on these tests are found in<sup>49</sup>. Even with these conservative  
177 tests, we found the exponential relation  $r_k = b m^{\delta t / \Delta t}$  expected for branching networks in the  
178 majority of experimental spike recordings (14 out of 21, Fig. S1).

**Avalanche size distributions** Avalanche sizes were determined similarly to the procedure  
described in<sup>1,3</sup>. Assuming that individual avalanches are separated in time, let  $\{t_i\}$  indicate  
bins without activity,  $a_{t_i} = 0$ . The size  $s_i$  of one avalanche is defined by the integrated activity  
between two subsequent bins with zero activity:

$$s_i = \sum_{t=t_i}^{t_{i+1}} a_t. \quad (1)$$

179 From the sample  $\{s_i\}$  of avalanche sizes, avalanche size distributions  $p(s)$  were determined  
180 using frequency counts. For illustration, we applied logarithmic binning, i.e. exponentially in-  
181 creasing bin widths for  $s$ .

182 For each experiments, these empirical avalanche size distributions were compared to avalanche  
183 size distributions obtained in a similar fashion from three different matched models (see below  
184 for details). Model likelihoods  $l(\{s_i\} | m)$  for all three models were calculated following<sup>64</sup>, and  
185 we considered the likelihood ratio to determine the most likely model based on the observed  
186 data.

187 **ISI distributions, Fano factors and spike count cross-correlations.** For each experiment  
188 and corresponding reverberating branching network (subsamped to a single unit), ISI distribu-  
189 tions were estimated by frequency counts of the differences between subsequent spike times for  
190 each channel.

191 We calculated the single unit Fano factor  $F = \text{Var}[a_t] / \langle a_t \rangle$  for the binned activity  $a_t$  of  
192 each single unit, with the bin sizes indicated in the respective figures. Likewise, single unit  
193 Fano factors for the reverberating branching networks were calculated from the subsampled  
194 and binned time series.

195 From the binned single unit activities  $a_t^1$  and  $a_t^2$  of two units, we estimated the spike count  
196 cross correlation  $r_{sc} = \text{Cov}(a_t^1, a_t^2) / \sigma_{a_t^1} \sigma_{a_t^2}$ . The two samples  $a_t^1$  and  $a_t^2$  for the reverberating  
197 branching networks were obtained by sampling two randomly chosen neurons.

## 198 Results

### 199 Subsampling-invariant inference of the dynamical state

200 In a companion study<sup>49</sup> we showed that conventional estimators based on linear regression<sup>54,55</sup>  
201 significantly underestimate  $\hat{m}$  when the system is subjected to subsampling (Fig. 1c), as it is  
202 always the case in electrophysiological recordings (Fig. 1b). The bias is considerable: For ex-  
203 ample, sampling 50 neurons or a single neuron in a branching network with  $m = 0.99$  resulted  
204 in the wrong estimates  $\hat{m}_{\text{Conv}} = 0.21$ , or even  $\hat{m}_{\text{Conv}} = 0.002$ , respectively (Fig. 1d). Thus a  
205 process close to instability ( $m = 0.99$ ) is mistaken as Poisson-like ( $\hat{m}_{\text{Conv}} = 0.002 \approx 0$ ) just  
206 because the estimate from subsampled activity is taken as face value for the entire population.  
207 The same study presented a novel *multistep regression* estimator (MR estimator), which correctly  
208 characterizes the population dynamics via  $m$  even under strong subsampling, in principle even  
209 from single neurons. Importantly, one can estimate  $m$  even when sampling only a very small

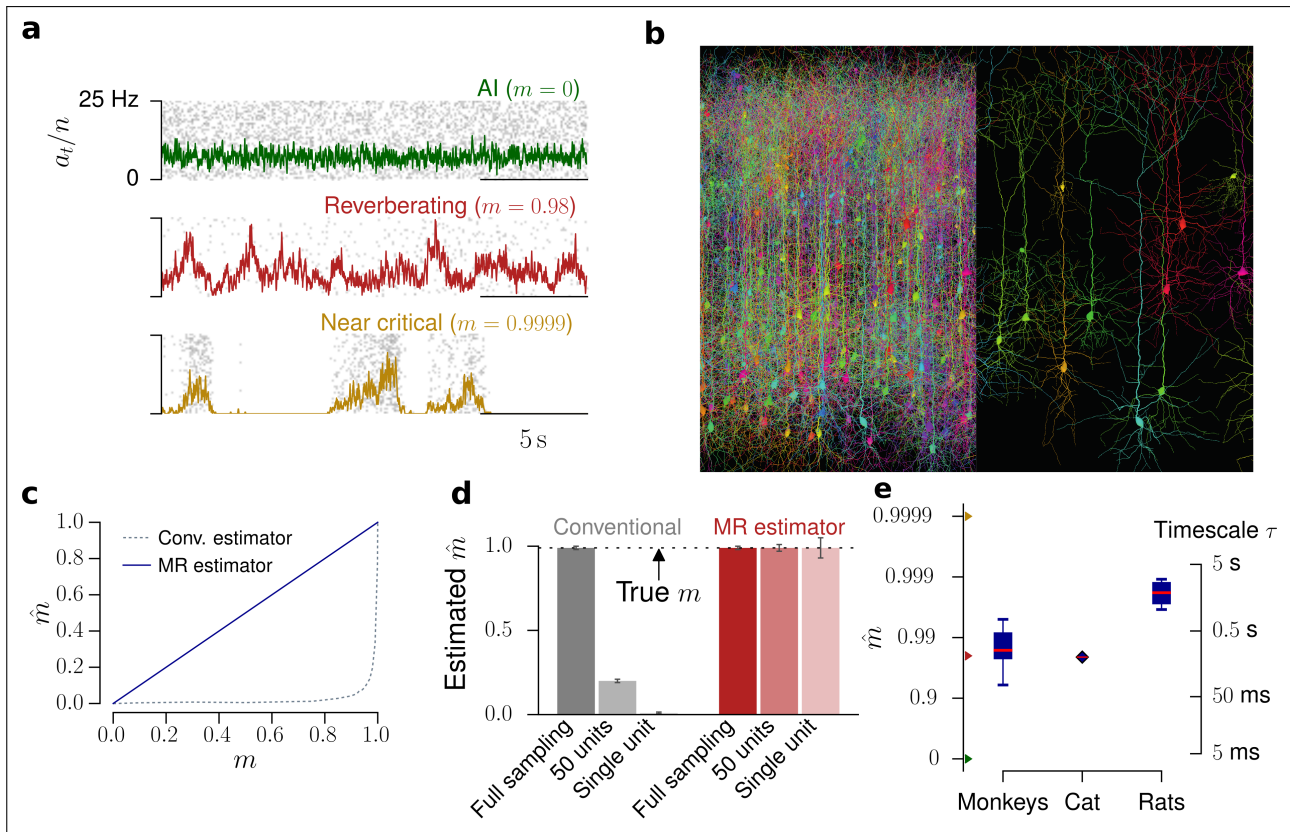

**FIGURE 1: Spatial subsampling.** **a.** Raster plot and population rate for networks with different spike propagation parameters. They exhibit vastly different dynamics, which readily manifest in the population activity. **b.** When assessing neuronal spiking activity, only a small subset of all neurons can be recorded. This spatial subsampling can hinder correct inference of collective properties of the whole network; figure created using TREES<sup>65</sup> and reproduced from<sup>49</sup>. **c.** Estimated branching ratio  $\hat{m}$  as a function of the simulated branching ratio  $m$ , inferred from subsampled activity (100 out of 10,000 neurons). While the conventional estimator misclassified  $m$  from this subsampled observation (gray, dotted line), the novel multistep regression (MR) estimator returned the correct values **d.** For a reverberating branching network with  $m = 0.98$ , the conventional estimator inferred  $\hat{m} = 0.21$  or  $\hat{m} = 0.002$  when sampling 50 or 1 units respectively, in contrast to MR estimation, which returned the correct  $\hat{m}$  even under strong subsampling. **e.** Using the novel MR estimator, cortical network dynamics in monkey prefrontal cortex, cat visual cortex, and rat hippocampus were consistently found to exhibit reverberating dynamics, with  $0.94 < \hat{m} < 0.991$  (median  $\hat{m} = 0.98$  over all experimental sessions, boxplots indicate median / 25% – 75% / 0% – 100% over experimental sessions per species). These correspond to network timescales between 80 ms and 2 s.

210 fraction of neurons and without knowing the network size  $N$ , the number of sampled neurons  
 211  $n$ , nor any moments of the underlying process.<sup>49</sup> This robustness makes the estimator an ideal  
 212 tool for the analysis of neuronal network recordings.

### 213 Reverberating spiking activity *in vivo*

214 We analyzed *in vivo* spiking activity from Macaque monkey prefrontal cortex during a short term  
 215 memory task,<sup>61</sup> anesthetized cat visual cortex with no stimulus,<sup>59</sup> and rat hippocampus during  
 216 a foraging task.<sup>57,58</sup> We applied MR estimation to the binned population spike counts  $a_t$  of the  
 217 recorded neurons of each session (see methods). In the continuous spectrum from AI ( $m = 0$ )  
 218 to critical ( $m = 1$ ), we identified a limited range of branching values *in vivo*: in the experiments  
 219  $\hat{m}$  ranged from 0.963 to 0.998 (median  $\hat{m} = 0.98$ ), corresponding to autocorrelation times  
 220 between 100 ms and 2 s (median 247 ms, Figs. 1e, S1). This clearly suggests that spiking activity  
 221 *in vivo* is neither AI-like, nor consistent with a critical state. Instead, it is poised in a regime

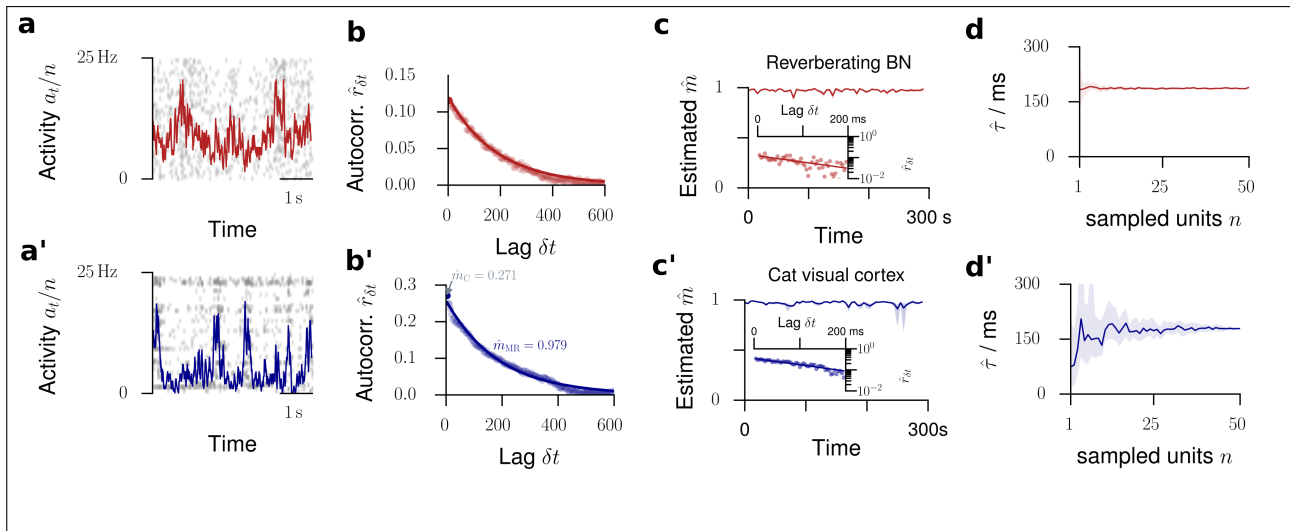

**FIGURE 2: Validation of the model assumptions.** The top row displays properties from a reverberating network model, the bottom row spike recordings from cat visual cortex. **a/a'**. Raster plot and population activity  $a_t$  within bins of  $\Delta t = 4$  ms, sampled from  $n = 50$  neurons. **b/b'**. Multistep regression (MR) estimation from the subsampled activity (5 min recording). The predicted exponential relation  $r_{\delta t} \sim m^{\delta t / \Delta t} = \exp(-\delta t / \tau)$  provides a validation of the applicability of the model. The experimental data are fitted by this exponential with remarkable precision. **c/c'**. The estimated branching parameter  $\hat{m}$  for 59 windows of 5 s length suggests stationarity of  $m$  over the entire recording (shaded area: 16% to 84% confidence intervals). The variability in  $\hat{m}$  over consecutive windows was comparable for experimental recording and the matched network ( $p = 0.09$ , Levene test). Insets: MR estimation exemplified for one example window each. **d/d'**. When subsampling even further, MR estimation always returns the correct timescale  $\hat{\tau}$  (or  $\hat{m}$ ) in the model. In the experiment, this invariance to subsampling also holds, down to  $n \approx 10$  neurons (shaded area: 16% to 84% confidence intervals estimated from 50 subsets of  $n$  neurons).

222 that, unlike critical or AI, does not maximize one particular property alone but may combine  
 223 features of both (see discussion). Due to the lack of one prominent characterizing feature, we  
 224 name it the *reverberating* regime, stressing that activity reverberates (different from the AI state)  
 225 at timescales of hundreds of milliseconds (different from a critical state, where they can persist  
 226 infinitely).

### 227 **The reverberating state differs from criticality**

228 On first sight,  $\hat{m} = 0.98$  of the reverberating state may suggest that the collective spiking  
 229 dynamics is very close to critical. Indeed, physiologically a  $\Delta m \approx 1.6\%$  difference to criticality  
 230 is small in terms of the effective synaptic strength. However, this apparently small difference  
 231 in single unit properties has a large impact on the collective *dynamical* fingerprint and makes  
 232 AI, reverberating, and critical states clearly distinct: (1) This distinction is readily manifest in  
 233 the fluctuations of the population activity, where states with  $m = 0.98$  and  $m = 0.999$  are  
 234 clearly different (Fig. 1a). (2) Consider the sensitivity to a small input, i.e. the susceptibility  
 235  $\chi = \partial \langle A_t \rangle / \partial h = \frac{1}{1-m}$ . The susceptibility diverges at criticality. A critical network is thus  
 236 overly sensitive to input. In contrast, states with  $m \approx 0.98$  assure sensitivity without instability.  
 237 (3) Likewise, the  $\Delta m \approx 1.6\%$  difference limits the intrinsic timescale of the dynamics to a few  
 238 hundred milliseconds, while at criticality it approaches infinity. (4) Because of the divergences  
 239 at criticality, network dynamics dramatically differ between  $m = 0.9$ ,  $m = 0.99$  or  $m = 0.999$ :  
 240 for example, the differences in susceptibility (sensitivity) and variance are 100-fold. Because this  
 241 has a strong impact on network dynamics and putative network function, finely distinguishing  
 242 between dynamical states is both important and feasible even if the corresponding differences  
 243 in effective synaptic strength ( $m$ ) appear small.

## 244 **Validity of the approach**

245 There is a straight-forward verification of the validity of our phenomenological model: it predicts  
246 an exponential autocorrelation function  $r_{\delta t}$  for the population activity  $a_t$ . We found that the  
247 activity in cat visual cortex (Figs. 2a,a') is surprisingly well described by this exponential fit (Fig.  
248 2b,b'). This validation holds to the majority of experiments investigated (14 out of 21, Fig. S1).

249 A second verification of our approach is based on its expected invariance under subsam-  
250 pling: We further subsampled the activity in cat visual cortex by only taking into account spikes  
251 recorded at a subset of  $n$  out of all available single units. As predicted (Fig. 2d), the estimates of  
252  $\hat{m}$ , or equivalently of  $\hat{\tau}$ , coincided for any subset of single units. Only if the activity of less than  
253 5 out of the available 50 single units was considered, the autocorrelation time was underesti-  
254 mated (Fig. 2d'), most likely because of the heterogeneity of cortical networks. These results  
255 demonstrate, however, that our approach gives consistent results from the activity of  $n \geq 5$   
256 neurons, which were available for all investigated experiments.

## 257 **Origin of the activity fluctuations**

258 The fluctuations found in cortical spiking activity, instead of being intrinsically generated, could  
259 in principle arise from non-stationarities, which could in turn lead to misestimation of  $m$ . This  
260 is unlikely for three reasons: First, we defined a set of conservative tests to reject recordings that  
261 show any signature of common non-stationarities. Even with these tests, we found the exponen-  
262 tial relation  $r_{\delta t} \sim m^{\delta t/\Delta t}$  expected for branching networks not only in cat visual cortex, but in  
263 the majority of experiments (14 out of 21, Fig. S1). Second, recordings in cat visual cortex were  
264 acquired in absence of any stimulation, excluding stimulus-related non-stationarities. Third,  
265 when splitting the spike recording into short windows, the window-to-window variation of  $\hat{m}$   
266 in the recording did not differ from that of stationary *in vivo*-like branching networks ( $p = 0.3$ ,  
267 Figs. 2c,c'). The *in vivo*-like branching network by definition was set up with the same branch-  
268 ing ratio  $m$ , spike rate  $\langle a_t \rangle$ , number of sampled neurons  $n$ , and duration as the experimental  
269 recording (e.g. for the cat  $n = 50$ ,  $m = 0.98$ ,  $\bar{r} = 7.9$  Hz, recording of 295 s length). For these  
270 reasons the observed fluctuations likely reflect intrinsic timescales of the underlying collective  
271 network dynamics.

## 272 **Timescales of the network and single units**

273 The dynamical state described by  $m$  directly relates to an exponential autocorrelation func-  
274 tion with an intrinsic network timescale of  $\tau = -\Delta t / \ln m$ . Exemplarily for the cat recording,  
275  $m = 0.98$  implies a network timescale of  $\tau = 188$  ms, where we here chose  $\Delta t = 4$  ms. While  
276 the autocorrelation function of the full network activity is expected to show an exponential  
277 decay, we showed that the autocorrelation of single neuron activity rapidly decreases at the  
278 timescale of a bin size (Fig. 3a). This rapid decrease is typically interpreted a lack of memory,  
279 overlooking that single neurons do not need to be equivalent to the network in terms of auto-  
280 correlation strength. Our theoretical results explain how this prominent dip comes about even  
281 in reverberating systems: because of the strong subsampling when considering single neuron  
282 activity, the strength of autocorrelation is decreased by a constant factor for any lag  $\delta t \neq 0$ . Ig-  
283 noring the value at  $\delta t = 0$ , the floor of the autocorrelation function still unveils the exponential  
284 relation. Remarkably, the autocorrelogram of single units in cat visual cortex displayed precisely  
285 the shape of autocorrelation predicted for single neurons (compare Figs. 3a and b).

286 Although our results were largely invariant to further subsampling (provided  $n \geq 5$ , Fig.  
287 2d'), the intrinsic timescales  $\tau$  (or  $m$ ) of single neurons differed from the network timescale,  
288 as one might expect in heterogeneous systems. We found that single neuron timescales were  
289 typically smaller than the network timescale (Fig. 3c, median  $\tau = 85$  ms for single neurons in  
290 cat visual cortex versus  $\tau = 180$  ms for the network, Figs. 2d', S9c). Therefore, the network  
291 timescale inferred by our approach contributes further information about network dynamics  
292 compared to previous studies which only considered single neurons.<sup>34</sup>



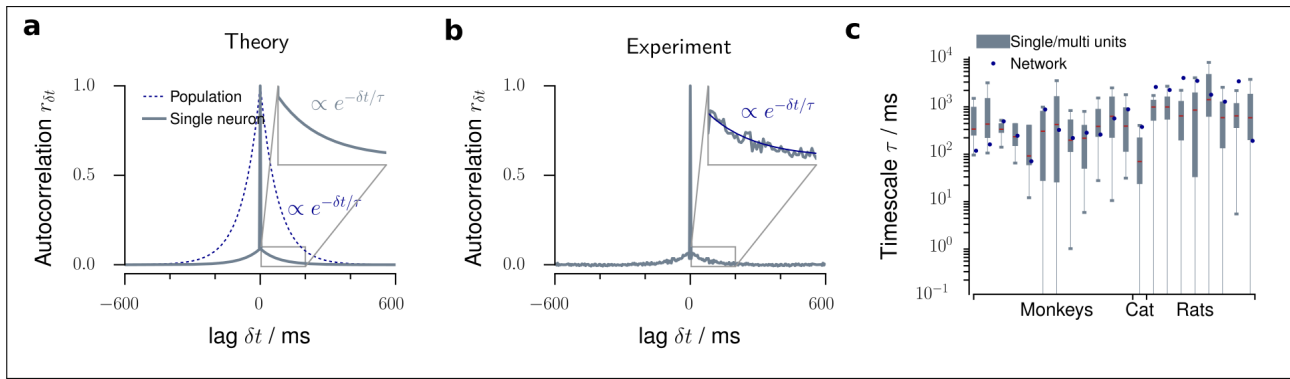

**FIGURE 3: MR estimation and autocorrelation times.** **a.** In a branching model, the autocorrelogram of the population activity is exponential with decay time  $\tau$  (blue dotted line). In contrast, the autocorrelogram for single neurons shows a sharp drop from  $r_0 = 1$  at lag  $\delta t = 0$  to the next lag  $r_{\pm\Delta t}$  (gray solid line). We showed that this drop is a subsampling-induced bias. When ignoring the zero-lag value, the autocorrelation strength is decreased, but the exponential decay and even the value of the autocorrelation time  $\tau$  of the network activity are preserved (inset). **b.** The autocorrelogram of single neuron activity recorded in cat visual cortex precisely resembles this theoretical prediction, namely a sharp drop and then an exponential decay. **c.** Single unit and population timescales for all experimental sessions. The boxplots indicate the distribution of timescales inferred from single unit activity (median in red / 25% – 75% / 2.5% – 97.5%), the blue dots the timescale inferred from the population activity of all sampled units.

### 293 Established methods are biased to identifying AI dynamics

294 On the population level, networks with different  $m$  are clearly distinguishable (Fig. 1a). Surprisingly, single neuron statistics, namely interspike interval (ISI) distributions, Fano factors, 295 conventional estimation of  $m$ , and the autocorrelation  $r_{\delta t}$ , all returned signatures of AI activity 296 regardless of the underlying network dynamics and cannot serve as a reliable indicator for the 297 network’s dynamical state. 298

299 First, exponential interspike interval (ISI) distributions are considered a strong indicator of 300 Poisson-like firing. Surprisingly, the ISIs of single neurons in the *in vivo*-like branching network 301 closely followed exponential distributions, which were determined mainly by the firing rate, and 302 were almost indistinguishable from ISI distributions obtained from AI networks (Figs. 4a,a’, S2). 303 This result was confirmed by coefficients of variation close to unity, as expected for exponential 304 distributions (Fig. S2).

305 Second, the Fano factor  $F$  for the activity of single neurons was close to unity, a hallmark 306 feature of irregular spiking,<sup>35</sup> in any network model (Fig. 5g, analytical result: Eq. (S8)) and for 307 single unit activity across all units and experiments (Figs. 4b,b’, S3). Even when increasing the 308 bin size to 4 s, the median Fano factor of single unit activity did not exceed  $F = 10$  in any of 309 the experiments, even in those with the longest reverberation. In contrast, for the full network 310 the Fano factor rose to  $F \approx 10^4$  for the *in vivo*-like branching network and diverged when 311 approaching criticality (Fig. 5g, analytical result: Eq. (S4)).

312 Third, conventional regression estimators<sup>54,55</sup> are biased towards inferring irregular activity, 313 as shown before. Here, conventional estimation yielded a median of  $\hat{m} = 0.057$  for single 314 neuron activity in cat visual cortex, in contrast to  $\hat{m} = 0.954$  returned by MR estimation even 315 from single unit recordings (Fig. S9).

316 Fourth, when examining the autocorrelation function of an experimental recording (Fig. 3b) 317 the prominent decay of  $r_{\delta t}$  prevails and hence single neuron activity appears uncorrelated in 318 time.

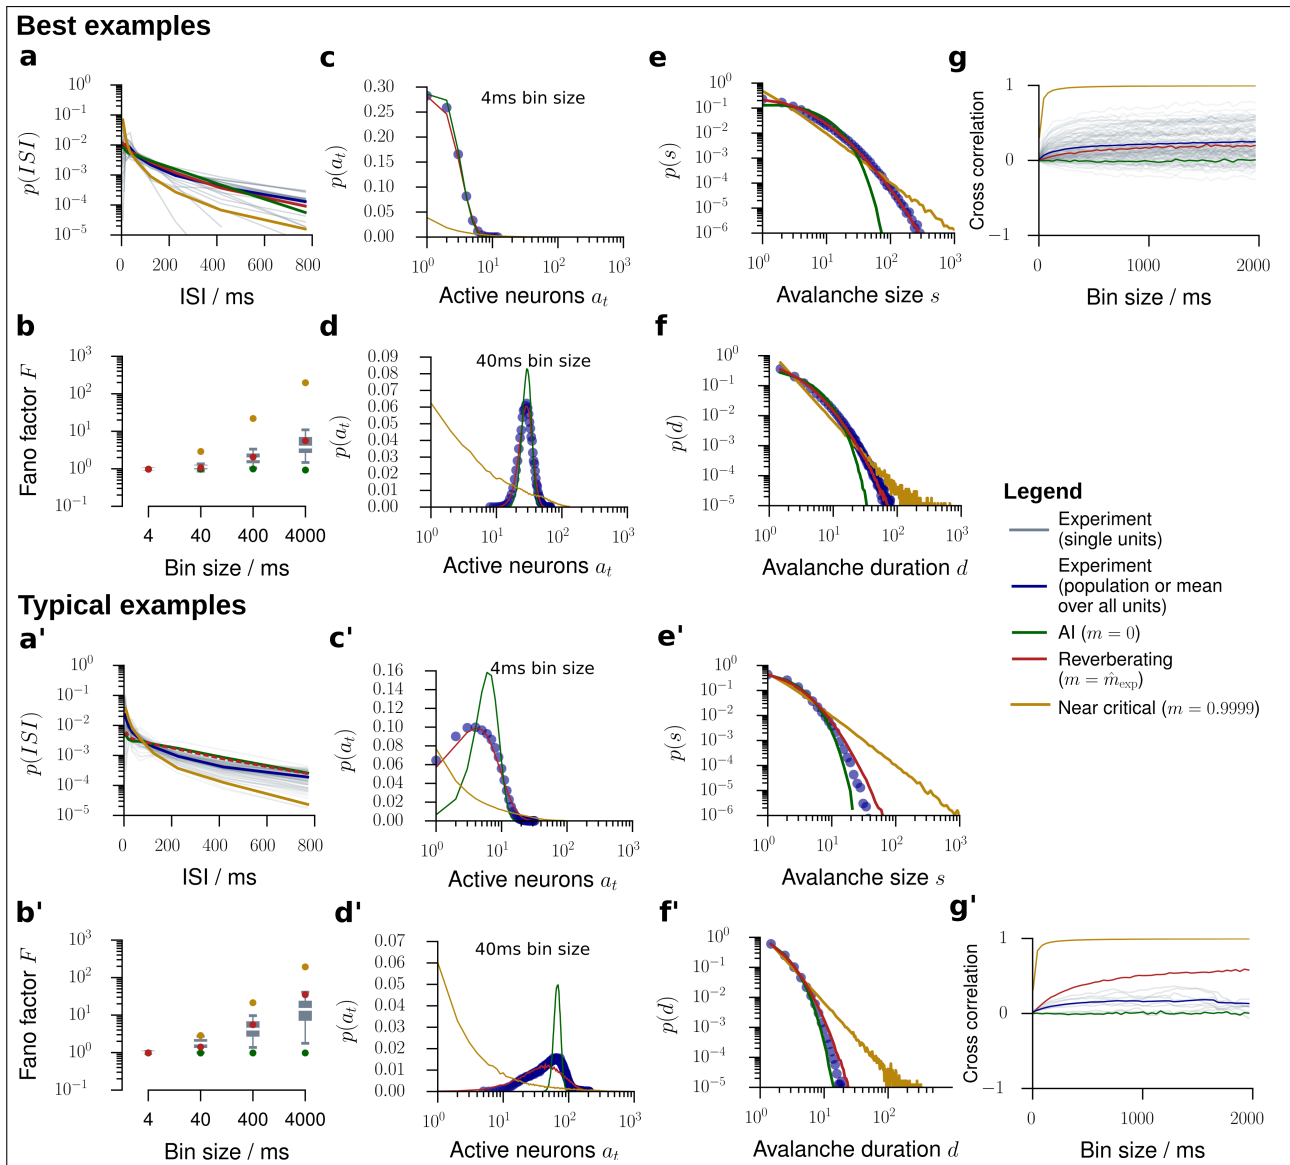

**FIGURE 4: Model validation for *in vivo* spiking activity.** We validated our model by comparing experimental results to predictions obtained from the *in vivo*-like, reverberating model, which was matched to the recording in the mean rate, inferred  $m$ , and number of recorded neurons. In general, the experimental results (gray or blue) were best matched by this reverberating model (red), compared to asynchronous irregular (AI, green) and critical (yellow) models. From all experimental sessions, best examples (top) and typical examples (bottom) are displayed. For results from all experimental sessions see Figs. S2 to S8. **a/a'**. Inter-spike-interval (ISI) distributions. **b/b'**. Fano factors of single neurons for bin sizes between 4 ms and 4 s. **c/c'**. Distribution of spikes per bin  $p(a_t)$  at a bin size of 4 ms. **d/d'**. Same as **c/c'** with a bin size of 40 ms. **e/e'**. *In vivo* avalanche size distributions  $p(s)$  for all sampled units. AI activity lacks large avalanches, near critical activity produces power-law distributed avalanches, even under subsampling. **f/f'**. *In vivo* avalanche duration distributions  $p(d)$  for all sampled units. **g/g'**. Spike count cross-correlations ( $r_{sc}$ ) as a function of the bin size.

### 319 Cross-validation of model predictions

320 We compared the experimental results to an *in vivo*-like model, which was matched to the  
 321 recording only in the average firing rate of single neurons, and in the inferred branching  
 322 ratio  $m$ . Remarkably, this *in vivo*-like branching network could predict statistical properties not  
 323 only of single neurons as shown before (ISI and Fano factor, see above), but also pairwise and

324 population properties. This prediction capability further underlines the usefulness of this simple  
325 model to approximate the ground state of cortical dynamics.

326 First, the model predicted the activity distributions,  $p(a_t)$ , better than AI or critical net-  
327 works for the majority of experiments (15 out of 21, Figs. 4c,d,c',d', S5, S6), both for the exemplary  
328 bin sizes of 4 ms and 40 ms. Hence, branching networks only matched in their respective first  
329 moments of the activity distributions (through the rate) and first moments of the spreading be-  
330 havior (through  $m$ ) in fact approximated all higher moments of the activity distributions  $p(a_t)$ .

331 Likewise, the model predicted the distributions of neural avalanches, i.e. spatio-temporal  
332 clusters of activity (Figs. 4e,f,e', f', S7, S8). Characterizing these distributions is a classic ap-  
333 proach to assess criticality in neuroscience,<sup>1,10</sup> because avalanche size and duration distributions,  
334  $p(s)$  and  $p(d)$  respectively, follow power laws in critical systems (yellow). In contrast, for AI ac-  
335 tivity, they are approximately exponential<sup>66</sup> (green). The matched branching networks predicted  
336 neither exponential nor power law distributions for the avalanches, but very well matched the  
337 distributions of the experiment (compare red and blue). Indeed, model likelihood<sup>64</sup> favored the  
338 *in vivo*-like branching network over Poisson and critical networks for the majority experiments  
339 (18 out of 21, Fig. S7). Our results here are consistent with those of spiking activity in awake  
340 animals, which typically do not display power laws.<sup>2,3,43</sup> In contrast, most evidence for critical-  
341 ity has been based on *coarse* measures of neural activity (LFP, EEG, BOLD; see<sup>3</sup> and references  
342 therein).

343 Last, the model predicted the pairwise spike count cross correlation  $r_{sc}$ . In experiments,  $r_{sc}$   
344 is typically between 0.01 and 0.25, depending on brain area, task, and most importantly, the  
345 analysis timescale (bin size).<sup>37</sup> For the cat recording the model even correctly predicted the bin  
346 size dependence of  $r_{sc}$  from  $\bar{r}_{sc} \approx 0.004$  at a bin size of 4 ms (analytical result: Eq. (S11)) to  
347  $\bar{r}_{sc} \approx 0.3$  at a bin size of 2 s (Fig. 4g). Comparable results were also obtained for some mon-  
348 key experiments. In contrast, correlations in most monkey experiments and rat hippocampal  
349 neurons showed smaller correlation than predicted (Figs. 4g', S4). It is very surprising that the  
350 model correctly predicted the cross-correlation even in some experiments, as  $m$  was inferred  
351 only from the *temporal* structure of the spiking activity alone, whereas  $r_{sc}$  characterizes spatial  
352 dependencies.

353 Overall, by only estimating the effective synaptic strength  $m$  from the *in vivo* recordings,  
354 higher-order properties like avalanche size distributions, activity distributions and in some cases  
355 spike count cross correlations could be closely matched using the generic branching network.

### 356 **The dynamical state determines responses to small stimuli**

357 After validating the model using a set of statistical properties that are well accessible experimen-  
358 tally, we now turn to making predictions for yet unknown properties, namely network responses  
359 to small stimuli. In the line of London and colleagues<sup>48</sup>, assume that on a background of spiking  
360 activity one single extra spike is triggered. This spike may in turn trigger new spikes, lead-  
361 ing to a cascade of additional spikes  $\Delta_t$  propagating through the network. A dynamical state  
362 with branching ratio  $m$  implies that *on average*, this perturbation decays with time constant  
363  $\tau = -\Delta t / \log m$ . Similar to the approach in<sup>48</sup>, the evolution of the mean firing rate, averaged  
364 over a reasonable number of trials (here: 500) unveils the nature of the underlying spike propa-  
365 gation: depending on  $m$ , the rate excursions will last longer, the higher  $m$  (Figs. 5a,b,c, S10a).  
366 The perturbations are not deterministic, but show trial-to-trial variability which also depends  
367 on  $m$  (S10b).

368 Unless  $m > 1$ , the theory of branching networks ensures that perturbations will die out  
369 eventually after a duration  $d$ , having accumulated a total of  $\Delta = \sum_{t=1}^d \Delta_t$  extra spikes in total.  
370 This perturbation size  $\Delta$  and duration  $d$  follow specific distributions,<sup>50</sup> which are determined  
371 by  $m$ : they are power law distributed in the critical state, with a cutoff for any  $m < 1$  (Fig. 5f,  
372 Supplementary Figs. S10c,d). These distributions imply a characteristic perturbation size  $\langle \Delta \rangle$   
373 (Fig. 5d), which diverges at the critical point. The variability of the perturbation sizes is also

374 determined by  $m$  and also diverges at the critical point (inset of Fig. 5d and Supplementary Fig.  
375 S10e).

376 Taken together, these results imply that the closer a neuronal network is to criticality, the  
377 more sensitive it is to external perturbations and can better amplify small stimuli. At the same  
378 time, these networks also show larger trial-to-trial variability. For typical cortical networks, we  
379 found that the response to one single extra spike will on average comprise between 20 and 1000  
380 additional spikes in total (Figs. 5e).

### 381 **The dynamical state determines network susceptibility and variability**

382 Moving beyond single spike perturbations, our model gives precise predictions for the network  
383 response to continuous stimuli. If extra action potentials are triggered at rate  $h$  in the network,  
384 the network will again amplify these external activations, depending on  $m$ . Provided an ap-  
385 propriate stimulation protocol, this rate response could be measured and our prediction tested  
386 in experiments (Fig. S10g). The susceptibility  $dr/dh$  diverges at the critical transition and is  
387 unique to a specific branching ratio  $m$ . We predict that typical cortical networks will amplify a  
388 small, but continuous increase of the input rate about 50-fold (Fig. S10h, red).

389 While the mean activity is determined by the network input and its susceptibility, the net-  
390 work activity fluctuates around this mean value. The magnitude of these fluctuations in relation  
391 to the mean can be described by the network Fano factor  $F = \text{Var}[A_t] / \langle A_t \rangle$  (Fig. 5g). This  
392 quantity cannot be directly inferred from experimental recordings, because the Fano factor of  
393 subsampled populations severely underestimates the network Fano factor, as shown before. We  
394 here used our *in vivo*-like model to obtain estimates of the network Fano factor: for a bin size of  
395 4 ms it is about  $F \approx 40$  and rises to  $F \approx 4000$  for bin sizes of several seconds.

### 396 **Distinguishing afferent and recurrent activation**

397 Last, our model gives an easily accessible approach to solving the following question: given a  
398 spiking neuronal network, which fraction of the activity is generated by recurrent activation  
399 from within the network, and which fraction can be attributed to external, afferent excitation?  
400 The branching model readily provides an answer: the fraction of externally generated activity is  
401  $h / \langle A \rangle = 1 - m$  (Fig. 5h). In this framework, AI-like networks are completely driven by external  
402 input currents or noise, while reverberating networks generate a substantial fraction of their  
403 activity intrinsically. For the experiments investigated in this study, we inferred that between  
404 0.1% and 7% of the activity are externally generated (median 2%, Fig. 5i). While this view may  
405 be simplistic given the complexity of neuronal network activity, keep in mind that “all models  
406 are wrong, but some are useful”.<sup>67</sup> Here, the model has proven to provide a good first order  
407 approximation and therefore promises to make reasonable predictions on properties of spiking  
408 networks.

## 409 **Discussion**

### 410 **Our results resolve contradictions between AI and critical states**

411 Our results for spiking activity *in vivo* suggest that network dynamics shows AI-like statistics,  
412 because under subsampling the observed correlations are underestimated. In contrast, typical  
413 experiments assessing criticality potentially overestimated correlations by sampling from over-  
414 lapping populations (LFP, EEG) and thereby hampered a fine distinction between critical and  
415 subcritical states.<sup>68</sup> By employing for the first time a consistent, quantitative estimation, we pro-  
416 vided evidence that *in vivo* spiking population dynamics reflects a reverberating state, i.e. it lives  
417 in a narrow regime around  $m = 0.98$ . This result is supported by the findings by Dahmen and  
418 colleagues:<sup>69</sup> based on distributions of covariances, they inferred that cortical networks should  
419 operate in a regime below criticality. Given the generality of our results across different species,  
420 brain areas, and cognitive states, our results suggest self-organization to this regime as a general  
421 organization principle for neural network dynamics.

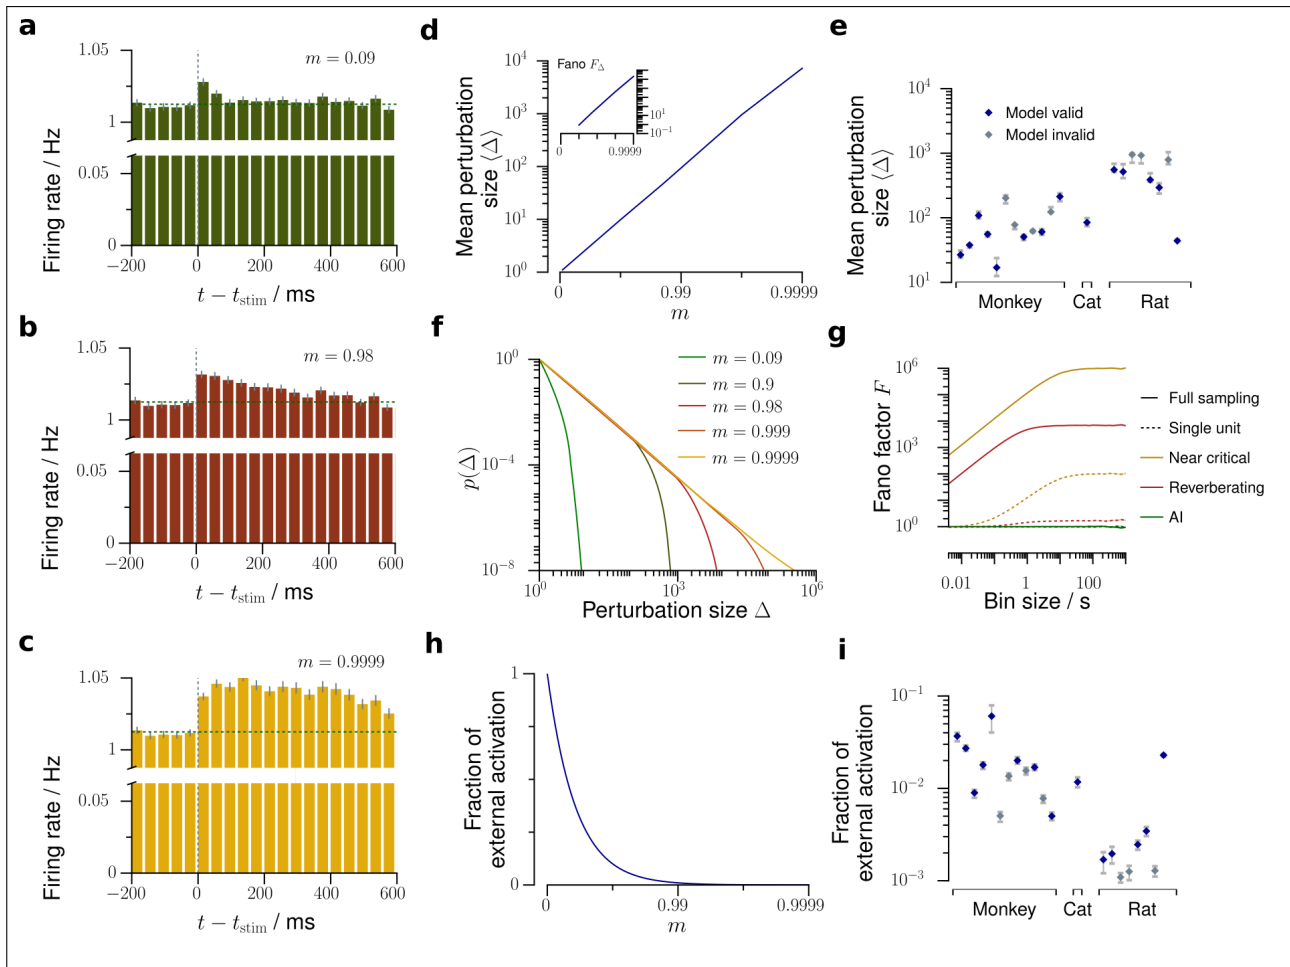

**FIGURE 5: Predictions about network activity.** Using our *in-vivo*-like, reverberating model, we can predict several network properties, which are yet very hard or impossible to obtain experimentally. **a – c.** In response to one single extra spike, a perturbation propagates in the network depending on the branching ratio  $m$  and can be observed as a small increase of the average firing rate of the sampled neurons, here simulated for 500 trials (see also London et al. [48]). This increase of firing rate decays exponentially, with the decay time  $\tau$  being determined by  $m$ . The perturbation **a** is rapidly quenched in the asynchronous irregular network, **b** decays slowly over hundreds of milliseconds in the reverberating state, or **c** persists almost infinitely in the critical state. **d.** The average perturbation size  $\langle \Delta \rangle$  and Fano factor  $F_{\Delta}$  (inset) increase strongly with  $m$ . **e.** Average total perturbation sizes predicted for each spike recording of mammalian cortex (errorbars: 5% – 95% confidence intervals). **f.** Distribution  $p(\Delta)$  of total perturbation sizes  $\Delta$ . The asynchronous irregular networks show approximately Poisson distributed, near critical networks power-law distributed perturbation sizes. **g.** Bin size dependent Fano factors of the activity, here exemplarily shown for the asynchronous irregular ( $m = 0$ , green), representative reverberating ( $m = 0.98$ , red), and near critical ( $m = 0.9999$ , yellow) networks. While the directly measurable Fano factor of single neurons (dotted lines) underestimates the Fano factor of the whole network, the model allows to predict the Fano factor of the whole network (solid lines). **h.** The fraction of the externally generated spikes compared to all spikes in the network strongly decreases with larger  $m$ . **i.** Fraction of the externally generated spikes predicted for each spike recording of mammalian cortex (errorbars as in **e**).

#### 422 **The reverberating state combines features of AI and critical regimes**

423 Operating in a reverberating state, which is between AI and critical, may combine the compu-  
 424 tational advantages of the two dynamical states: (1) AI networks react to external input rapidly,  
 425 and show very little reverberation of the input. In contrast, criticality is associated with “critical  
 426 slowing down”, i.e. performing any computation might take overly long. The  $m = 0.98$  state

427 shows intermediate timescales of a few hundred milliseconds. These reverberations may carry  
428 short term memory and allow to integrate information over limited timescales.<sup>27,70</sup> (2) Criti-  
429 cality has been associated with maximal processing capacity. However, a number of everyday  
430 tasks, e.g. memory recall, require only sufficient capacity for survival and reproduction rather  
431 than maximum capacity.<sup>71</sup> Thus maximizing this one property alone is most likely not neces-  
432 sary from an evolutionary point of view. One particular example manifest from our results is  
433 the trade-off between sensitivity and reliability: while the critical state maximizes sensitivity by  
434 amplifying small stimuli (Fig. 5h), this sensitivity comes at the cost of increased trial-to-trial  
435 variability (Fig. 5i) and therefore may hinder reliable responses.<sup>72</sup> (3) Criticality in a branch-  
436 ing process marks the transition to unstable dynamics. These instabilities have been associated  
437 with epilepsy.<sup>56</sup> The prevalence of epilepsy in humans<sup>73,74</sup> supports our results that the brain  
438 indeed operates biophysically still close to instability, but keeps a sufficient safety-margin to  
439 make seizures sufficiently unlikely.<sup>3</sup> This is in line with our results that the effective synaptic  
440 strength is close to, but not at  $m = 1$ .

#### 441 **More complex network models**

442 Cortical dynamics is clearly more complicated than a simple branching network. For example,  
443 heterogeneity of neuronal morphology and function, non-trivial network topology, and the com-  
444 plexity of neurons themselves are likely to have a profound impact on the population dynamics.  
445 However, we showed that *statistics* of cortical networks are well approximated by a branching  
446 network. Therefore, we interpret branching networks as a *statistical* approximation of spike  
447 propagation, which can capture dynamics as complex as cortical activity. By using branching  
448 networks, we draw on the powerful advantage of analytical tractability, which allowed for basic  
449 insight into dynamics and stability of cortical networks.

450 It is a logical next step to refine the model by including additional relevant parameters,  
451 guided by the results obtained from the well-understood estimator. For example, our results  
452 show that networks with balanced excitation and inhibition,<sup>8,75,76</sup> which became a standard  
453 model of neuronal networks,<sup>77</sup> should be extended to incorporate the network reverberations  
454 observed *in vivo*. Possible candidate mechanisms are increased coupling strength or inhomoge-  
455 neous connectivity. Both have already been shown to exhibit rate fluctuations with timescales  
456 of several hundred milliseconds.<sup>78–80</sup>

457 Likewise, neuron models of spike responses typically model normally distributed network  
458 synaptic currents, which originate from the assumption of uncorrelated Poisson inputs. Our  
459 results suggest that this input should rather exhibit reverberating properties with timescales of  
460 a few hundred milliseconds to reflect input from cortical neurons *in vivo*.

#### 461 **Deducing network properties from the tractable model**

462 Using the tractable model, we could predict and validate network properties, such as distribu-  
463 tions of avalanche sizes and durations, interspike intervals, or activities. Given the experimental  
464 agreement with these predictions, we deduced further properties, which are impossible or dif-  
465 ficult to assess experimentally and gave insight into more complex questions about network  
466 responses: how do perturbations propagate within the network and how susceptible is the net-  
467 work to external stimulation?

468 One particular question we could address is the following: which fraction of network activ-  
469 ity is attributed to external or recurrent, internal activation? We inferred that about 98% of the  
470 activity are generated by recurrent excitation. However, note that this result likely depends on  
471 the brain area and cognitive state investigated: For layer 4 of primary visual cortex in awake  
472 mice, Reinhold and colleagues<sup>81</sup> concluded that the fraction of recurrent cortical excitation rises  
473 to only about 72% and cortical activity dies out with a timescale of about 12 ms after thalamic  
474 silencing. Their numbers agree perfectly well with our phenomenological model: a timescale  
475 of 12 ms implies that the fraction of recurrent cortical activation is  $m \approx 0.71$ , just as found  
476 experimentally. Under anesthesia, in contrast, they report timescales of several hundred mil-

477 liseconds, in agreement with our results. These differences show that the fraction of external  
478 activation may strongly depend on cortical area, layer, and cognitive state. The novel estima-  
479 tor can in future contribute to a deeper insight into these differences, because it allows for a  
480 straight-forward assessment of afferent versus recurrent activation without the requirement of  
481 thalamic or cortical silencing.

## 482 Acknowledgments

483 JW received support from the Gertrud-Reemstma-Stiftung. VP received financial support from  
484 the German Ministry for Education and Research (BMBF) via the Bernstein Center for Com-  
485 putational Neuroscience (BCCN) Göttingen under Grant No. 01GQ1005B, and by the German-  
486 Israel-Foundation (GIF) under grant number G-2391-421.13. JW and VP received financial sup-  
487 port from the Max Planck Society.

## 488 Competing interests

489 The authors declare that the research was conducted in the absence of any commercial or fi-  
490 nancial relationships that could be construed as a potential conflict of interest.

## 491 References

- 492 [1] V. Priesemann et al. “Subsampling effects in neuronal avalanche distributions recorded in vivo.” *BMC Neurosci.*  
493 10 (2009), 40.
- 494 [2] T. L. Ribeiro et al. “Spike Avalanches Exhibit Universal Dynamics across the Sleep-Wake Cycle”. *PLoS One* 5.11  
495 (2010). Ed. by O. Sporns, e14129.
- 496 [3] V. Priesemann et al. “Spike avalanches in vivo suggest a driven, slightly subcritical brain state.” *Front. Syst.*  
497 *Neurosci.* 8.June (2014), 108.
- 498 [4] T. L. Ribeiro et al. “Undersampled critical branching processes on small-world and random networks fail to  
499 reproduce the statistics of spike avalanches.” *PLoS One* 9.4 (2014), e94992.
- 500 [5] B. D. Burns and A. C. Webb. “The Spontaneous Activity of Neurones in the Cat’s Cerebral Cortex”. *Proc. R.*  
501 *Soc. B Biol. Sci.* 194.1115 (1976), 211–223.
- 502 [6] W. R. Softky and C Koch. “The highly irregular firing of cortical cells is inconsistent with temporal integration  
503 of random EPSPs.” *J. Neurosci.* 13.1 (1993), 334–350.
- 504 [7] R. B. Stein et al. “Neuronal variability: noise or part of the signal?” *Nat. Rev. Neurosci.* 6.5 (2005), 389–397.
- 505 [8] C. v. Vreeswijk and H Sompolinsky. “Chaos in Neuronal Networks with Balanced Excitatory and Inhibitory  
506 Activity”. *Science.* 274.5293 (1996), 1724–1726.
- 507 [9] N. Brunel. “Dynamics of networks of randomly connected excitatory and inhibitory spiking neurons”. *J. Phys-*  
508 *iol. Paris* 94.5-6 (2000), 445–463.
- 509 [10] J. M. Beggs and D. Plenz. “Neuronal Avalanches in Neocortical Circuits”. *J. Neurosci.* 23.35 (2003), 11167–11177.
- 510 [11] a. Levina et al. “Dynamical synapses causing self-organized criticality in neural networks”. *Nat. Phys.* 3.12  
511 (2007), 857–860.
- 512 [12] A. Levina et al. “Phase Transitions towards Criticality in a Neural System with Adaptive Interactions”. *Phys.*  
513 *Rev. Lett.* 102.11 (2009), 118110.
- 514 [13] D. R. Chialvo. “Emergent complex neural dynamics”. *Nat. Phys.* 6.10 (2010), 744–750.
- 515 [14] J. M. Beggs and N. Timme. “Being critical of criticality in the brain”. *Front. Physiol.* 3 JUN.June (2012), 1–14.
- 516 [15] D. Plenz and E. Niebur, eds. *Criticality in Neural Systems*. Weinheim, Germany: Wiley-VCH Verlag GmbH &  
517 Co. KGaA, 2014.
- 518 [16] G. Tkačik et al. “Thermodynamics and signatures of criticality in a network of neurons”. *Proc. Natl. Acad. Sci.*  
519 112.37 (2015), 11508–11513.
- 520 [17] J. Humplik and G. Tkačik. “Probabilistic models for neural populations that naturally capture global coupling  
521 and criticality”. *PLoS Comput. Biol.* 13.9 (2017), 1–26.
- 522 [18] H. B. Barlow. “Possible Principles Underlying the Transformations of Sensory Messages”. In: *Sens. Commun.*  
523 Ed. by W. A. Rosenblith. The MIT Press, 2012, 217–234.
- 524 [19] J. J. Atick. “Could information theory provide an ecological theory of sensory processing?” *Netw. Comput.*  
525 *neural Syst.* 3.2 (1992), 213–251.

- 526 [20] A. J. Bell and T. J. Sejnowski. “The ‘independent components’ of natural scenes are edge filters”. *Vision Res.*  
527 37.23 (1997), 3327–3338.
- 528 [21] J. H. van Hateren and A. van der Schaaf. “Independent component filters of natural images compared with  
529 simple cells in primary visual cortex”. *Proc. R. Soc. London B Biol. Sci.* 265.1394 (1998), 359–366.
- 530 [22] A. Hyvärinen and E. Oja. “Independent component analysis: Algorithms and applications”. *Neural Networks*  
531 13 (2000), 411–430.
- 532 [23] N. Bertschinger and T. Natschläger. “Real-time computation at the edge of chaos in recurrent neural networks”.  
533 *Neural Comput.* 16.7 (2004), 1413–1436.
- 534 [24] C. Haldeman and J. Beggs. “Critical Branching Captures Activity in Living Neural Networks and Maximizes  
535 the Number of Metastable States”. *Phys. Rev. Lett.* 94.5 (2005), 058101.
- 536 [25] O. Kinouchi and M. Copelli. “Optimal dynamical range of excitable networks at criticality”. *Nat. Phys.* 2.5  
537 (2006), 348–351.
- 538 [26] X. R. Wang et al. “Fisher information at the edge of chaos in random Boolean networks”. *Artif. Life* 17.4 (2011),  
539 315–329.
- 540 [27] J. Boedecker et al. “Information processing in echo state networks at the edge of chaos”. *Theory Biosci.* 131.3  
541 (2012), 205–213.
- 542 [28] W. L. Shew and D. Plenz. “The functional benefits of criticality in the cortex.” *Neuroscientist* 19.1 (2013), 88–100.
- 543 [29] B. Del Papa et al. “Criticality meets learning: Criticality signatures in a self-organizing recurrent neural net-  
544 work”. *PLoS One* 12.5 (2017), 1–22.
- 545 [30] H. Jaeger. “Harnessing Nonlinearity: Predicting Chaotic Systems and Saving Energy in Wireless Communica-  
546 tion”. *Science.* 304.5667 (2004), 78–80.
- 547 [31] C. Huang and B. Doiron. “Once upon a (slow) time in the land of recurrent neuronal networks...”. *Curr. Opin.*  
548 *Neurobiol.* 46 (2017), 31–38.
- 549 [32] R. Chaudhuri et al. “A Large-Scale Circuit Mechanism for Hierarchical Dynamical Processing in the Primate  
550 Cortex”. *Neuron* 88.2 (2015), 419–431.
- 551 [33] C. J. Honey et al. “Slow Cortical Dynamics and the Accumulation of Information over Long Timescales”. *Neuron*  
552 76.2 (2012), 423–434.
- 553 [34] J. D. Murray et al. “A hierarchy of intrinsic timescales across primate cortex.” *Nat. Neurosci.* 17.12 (2014), 1661–  
554 3.
- 555 [35] R. R. de Ruyter van Steveninck et al. “Reproducibility and Variability in Neural Spike Trains”. *Science.* 275.5307  
556 (1997), 1805–1808.
- 557 [36] A. S. Ecker et al. “Supporting Online Material for Decorrelated Neuronal Firing in Cortical Microcircuits”.  
558 *Science.* 327.584 (2010), 26–31.
- 559 [37] M. R. Cohen and A. Kohn. “Measuring and interpreting neuronal correlations.” *Nat. Neurosci.* 14.7 (2011), 811–  
560 819.
- 561 [38] V. Pasquale et al. “Self-organization and neuronal avalanches in networks of dissociated cortical neurons.”  
562 *Neuroscience* 153.4 (2008), 1354–69.
- 563 [39] N. Friedman et al. “Universal Critical Dynamics in High Resolution Neuronal Avalanche Data”. *Phys. Rev. Lett.*  
564 108.20 (2012), 208102.
- 565 [40] E. Tagliazucchi et al. “Criticality in large-scale brain fmri dynamics unveiled by a novel point process analysis”.  
566 *Front. Physiol.* 3. February (2012), 1–12.
- 567 [41] O. Shriki et al. “Neuronal avalanches in the resting MEG of the human brain.” *J. Neurosci.* 33.16 (2013), 7079–90.
- 568 [42] P. Bak et al. “Self-organized criticality: An explanation of the 1/f noise”. *Phys. Rev. Lett.* 59.4 (1987), 381–384.
- 569 [43] C. Bédard et al. “Does the 1/f frequency scaling of brain signals reflect self-organized critical states?” *Phys.*  
570 *Rev. Lett.* 97.11 (2006), 1–4.
- 571 [44] G. Hahn et al. “Neuronal avalanches in spontaneous activity in vivo.” *J. Neurophysiol.* 104.6 (2010), 3312–22.
- 572 [45] V. Priesemann et al. “Neuronal avalanches differ from wakefulness to deep sleep—evidence from intracranial  
573 depth recordings in humans.” *PLoS Comput. Biol.* 9.3 (2013), e1002985.
- 574 [46] M. Girardi-Schappo et al. “Critical avalanches and subsampling in map-based neural networks coupled with  
575 noisy synapses”. *Phys. Rev. E - Stat. Nonlinear, Soft Matter Phys.* 88.2 (2013), 1–5.
- 576 [47] A. Levina and V. Priesemann. “Subsampling scaling”. *Nat. Commun.* 8. May (2017), 1–9.



- 577 [48] M. London et al. "Sensitivity to perturbations in vivo implies high noise and suggests rate coding in cortex."  
578 *Nature* 466.7302 (2010), 123–7.
- 579 [49] J. Wilting and V. Priesemann. "Inferring collective dynamical states from widely unobserved systems". *Nat.*  
580 *Commun.* 9.1 (2018), 2325.
- 581 [50] T. E. Harris. *The Theory of Branching Processes*. Springer Berlin, 1963.
- 582 [51] C. R. Heathcote. "A Branching Process Allowing Immigration". *J. R. Stat. Soc. Ser. B* 27.1 (1965), 138–143.
- 583 [52] A. G. Pakes. "Branching Processes with Immigration". *J. Appl. Probab.* 8.1 (1971), 32.
- 584 [53] J. Zierenberg et al. "Homeostatic plasticity and external input shape neural network dynamics". *Phys. Rev. X*  
585 In Press (2018).
- 586 [54] C. C. Heyde and E. Seneta. "Estimation Theory for Growth and Immigration Rates in a Multiplicative Process".  
587 *J. Appl. Probab.* 9.2 (1972), 235.
- 588 [55] C. Z. Wei. "Convergence rates for the critical branching process with immigration". *Stat. Sin.* 1 (1991), 175–184.
- 589 [56] C. Meisel et al. "Failure of adaptive self-organized criticality during epileptic seizure attacks." *PLoS Comput.*  
590 *Biol.* 8.1 (2012), e1002312.
- 591 [57] K Mizuseki et al. *Multi-unit recordings from the rat hippocampus made during open field foraging*. 2009.
- 592 [58] K Mizuseki et al. "Theta Oscillations Provide Temporal Windows for Local Circuit Computation in the Entorhinal-  
593 Hippocampal Loop". *Neuron* 64.2 (2009), 267–280.
- 594 [59] T. Blanche. *Multi-neuron recordings in primary visual cortex*. 2009.
- 595 [60] T. J. Blanche and N. V. Swindale. "Nyquist interpolation improves neuron yield in multiunit recordings." *J.*  
596 *Neurosci. Methods* 155.1 (2006), 81–91.
- 597 [61] G. Pipa et al. "Performance- and stimulus-dependent oscillations in monkey prefrontal cortex during short-  
598 term memory." *Front. Integr. Neurosci.* 3.October (2009), 25.
- 599 [62] F. Franke et al. "An online spike detection and spike classification algorithm capable of instantaneous resolu-  
600 tion of overlapping spikes." *J. Comput. Neurosci.* 29.1-2 (2010), 127–48.
- 601 [63] R. Pröpper and K. Obermayer. "Spyke Viewer: a flexible and extensible platform for electrophysiological data  
602 analysis." *Front. Neuroinform.* 7.November (2013), 26.
- 603 [64] A. Clauset et al. "Power-Law Distributions in Empirical Data". *SIAM Rev.* 51.4 (2009), 661–703.
- 604 [65] H. Cuntz et al. "One Rule to Grow Them All: A General Theory of Neuronal Branching and Its Practical  
605 Application". *PLoS Comput. Biol.* 6.8 (2010), e1000877.
- 606 [66] V. Priesemann and O. Shriki. "Can a time varying external drive give rise to apparent criticality in neural  
607 systems?" *In preparation.* ().
- 608 [67] G. E. P. Box. "Robustness in the strategy of scientific model building". In: *Robustness Stat.* Ed. by R. L. Launer  
609 and G. N. Wilkinson. Vol. 1. Academic Press, 1979, 201–236.
- 610 [68] J. Pinheiro Neto and V. Priesemann. "Coarse sampling bias inference of criticality in neural system". *In review.*  
611 ().
- 612 [69] D. Dahmen et al. "Distributions of covariances as a window into the operational regime of neuronal networks".  
613 *Prepr.* <http://arxiv.org/abs/1605.04153> (2016).
- 614 [70] X. J. Wang. "Probabilistic decision making by slow reverberation in cortical circuits". *Neuron* 36.5 (2002), 955–  
615 968.
- 616 [71] A. Lazar. "SORN: a Self-organizing Recurrent Neural Network". *Front. Comput. Neurosci.* 3.October (2009), 1–9.
- 617 [72] L. L. Gollo. "Coexistence of critical sensitivity and subcritical specificity can yield optimal population coding".  
618 *J. R. Soc. Interface* 14.134 (2017), 20170207.
- 619 [73] J. W. Sander. "The epidemiology of epilepsy revisited". *Curr. Opin. Neurol.* 16.2 (2003), 165–170.
- 620 [74] A. Neligan et al. "The epidemiology of the epilepsies". In: *Handb. Clin. Neurol.* Vol. 107. 2012, 113–133.
- 621 [75] C. van Vreeswijk and H Sompolsky. "Irregular firing in cortical circuits with inhibition/excitation balance".  
622 *Comput. Neurosci. Trends Reserach*, 1997 (1997), 209–213.
- 623 [76] N. Brunel. "Dynamics of networks of randomly connected excitatory and inhibitory spiking neurons". *J. Phys-*  
624 *iol. Paris* 94.5-6 (2000), 445–463.
- 625 [77] D. Hansel and C. van Vreeswijk. "The Mechanism of Orientation Selectivity in Primary Visual Cortex without  
626 a Functional Map". *J. Neurosci.* 32.12 (2012), 4049–4064.

- 627 [78] A. Litwin-kumar and B. Doiron. “Slow dynamics and high variability in balanced cortical networks with clustered connections”. *Nat. Neurosci.* 15.11 (2012), 1498–1505.  
628
- 629 [79] S. Ostoja. “Two types of asynchronous activity in networks of excitatory and inhibitory spiking neurons.” *Nat Neurosci* 17.4 (2014), 594–600.  
630
- 631 [80] J. Kadmon and H. Sompolinsky. “Transition to chaos in random neuronal networks”. *Phys. Rev. X* 5.4 (2015),  
632 1–28.
- 633 [81] K. Reinhold et al. “Distinct recurrent versus afferent dynamics in cortical visual processing.” *Nat. Neurosci.*  
634 18.12 (2015), 1789–1797.

635 **Supplementary material for “Inference, validation and predictions**  
 636 **about statistics and propagation of cortical spiking in vivo” by J.**  
 637 **Wilting and V. Priesemann**

638 **Supp. 1 Branching processes**

639 In a branching process (BP) with immigration<sup>50–52</sup> each unit  $i$  produces a random number  $y_{t,i}$   
 640 of units in the subsequent time step. Additionally, in each time step a random number  $h_t$  of  
 641 units immigrates into the system (drive). Mathematically, BPs are defined as follows:<sup>50,51</sup> Let  
 642  $y_{t,i}$  be independently and identically distributed non-negative integer-valued random variables  
 643 following a law  $Y$  with mean  $m = \langle Y \rangle$  and variance  $\sigma^2 = \text{Var}[Y]$ . Further,  $Y$  shall be non-  
 644 trivial, meaning it satisfies  $\text{P}[Y = 0] > 0$  and  $\text{P}[Y = 0] + \text{P}[Y = 1] < 1$ . Likewise, let  
 645  $h_t$  be independently and identically distributed non-negative integer-valued random variables  
 646 following a law  $H$  with mean rate  $h = \langle H \rangle$  and variance  $\xi^2 = \text{Var}[H]$ . Then the evolution of  
 647 the BP  $A_t$  is given recursively by

$$A_{t+1} = \sum_{i=1}^{A_t} y_{t,i} + h_t, \quad (\text{S1})$$

648 i.e. the number of units in the next generation is given by the offspring of all present units and  
 649 those that were introduced to the system from outside.

650 The stability of BPs is solely governed by the mean offspring  $m$ . In the subcritical state,  $m <$   
 651  $1$ , the population converges to a stationary distribution  $A_\infty$  with mean  $\langle A_\infty \rangle = h/(1 - m)$ .  
 652 At criticality ( $m = 1$ ),  $A_t$  asymptotically exhibits linear growth, while in the supercritical state  
 653 ( $m > 1$ ) it grows exponentially.

We will now derive results for the mean, variance, and Fano factor of subcritical branching  
 processes. Following previous results, taking expectation values of both sides of Eq. (S1) yields  
 $\langle A_{t+1} \rangle = m \langle A_t \rangle + h$ . Because of stationarity  $\langle A_{t+1} \rangle = \langle A_t \rangle = \langle A_\infty \rangle$  and the mean activity  
 is given by

$$\langle A_\infty \rangle = \frac{h}{1 - m}. \quad (\text{S2})$$

654 In order to derive an expression for the variance of the stationary distribution, observe that by the  
 655 theorem of total variance,  $\text{Var}[A_{t+1}] = \langle \text{Var}[A_{t+1} | A_t] \rangle + \text{Var}[\langle A_{t+1} | A_t \rangle]$ , where  $\langle \cdot \rangle$  denotes  
 656 the expected value, and  $A_{t+1} | A_t$  conditioning the random variable  $A_{t+1}$  on  $A_t$ . Because  $A_{t+1}$   
 657 is the sum of independent random variables, the variances also sum:  $\text{Var}[A_{t+1} | A_t] = \sigma^2 A_t +$   
 658  $\xi^2$ . Using the previous result for  $\langle A_\infty \rangle$  one then obtains

$$\text{Var}[A_{t+1}] = \xi^2 + \sigma^2 \frac{h}{1 - m} + \text{Var}[mA_t + h] = \xi^2 + \sigma^2 \frac{h}{1 - m} + m^2 \text{Var}[A_t].$$

659 Again, in the stationary distribution  $\text{Var}[A_{t+1}] = \text{Var}[A_t] = \text{Var}[A_\infty]$  which yields

$$\text{Var}[A_\infty] = \frac{1}{1 - m^2} \left( \xi^2 + \sigma^2 \frac{h}{1 - m} \right), \quad (\text{S3})$$

660 The Fano factor  $F_{A_t} = \text{Var}[A_t] / \langle A_t \rangle$  is easily computed from (S2) and (S3):

$$F_{A_t} = \frac{\xi^2}{h(1 + m)} + \frac{\sigma^2}{1 - m^2}. \quad (\text{S4})$$

661 Interestingly, the mean rate, variance, and Fano factor all diverge when approaching criticality  
 662 (given a constant input rate  $h$ ):  $\langle A_\infty \rangle \rightarrow \infty$ ,  $\text{Var}[A_\infty] \rightarrow \infty$ , and  $F_{A_t} \rightarrow \infty$  as  $m \rightarrow 1$ .

663 These results were derived without assuming any particular law for  $Y$  or  $H$ . Although the  
 664 limiting behavior of BPs does not depend on it,<sup>50–52</sup> fixing particular laws allows to simplify these  
 665 expressions further.

We here chose Poisson distributions with means  $m$  and  $h$  for  $Y$  and  $H$  respectively:  $y_{t,i} \sim \text{Poi}(m)$  and  $h_t \sim \text{Poi}(h)$ . We chose these laws for two reasons: (1) Poisson distributions allow for non-trivial offspring distributions with easy control of the branching ratio  $m$  by only one parameter. (2) For the brain, one might assume that each neuron is connected to  $k$  postsynaptic neurons, each of which is excited with probability  $p$ , motivating a binomial offspring distribution with mean  $m = kp$ . As in cortex  $k$  is typically large and  $p$  is typically small, the Poisson limit is a reasonable approximation. Choosing these distributions, the variance and Fano factor become

$$\begin{aligned} \text{Var}[A_t] &= h / ((1 - m)^2(1 + m)), \\ F_{A_t} &= 1 / (1 - m^2). \end{aligned} \quad (\text{S5})$$

666 Both diverge when approaching criticality ( $m = 1$ ).

## 667 **Supp. 2 Subsampling**

668 A general notion of subsampling was introduced in Wilting and Priesemann [49]. The subsam-  
 669 pled time series  $a_t$  is constructed from the full process  $A_t$  based on the three assumptions: (i)  
 670 The sampling process does not interfere with itself, and does not change over time. Hence the re-  
 671 alization of a subsample at one time does not influence the realization of a subsample at another  
 672 time, and the conditional *distribution* of  $(a_t | A_t)$  is the same as  $(a_{t'} | A_{t'})$  if  $A_t = A_{t'}$ . However,  
 673 even if  $A_t = A_{t'}$ , the subsampled  $a_t$  and  $a_{t'}$  do not necessarily take the same value. (ii) The  
 674 subsampling does not interfere with the evolution of  $A_t$ , i.e. the process evolves independent of  
 675 the sampling. (iii) *On average*  $a_t$  is proportional to  $A_t$  up to a constant term,  $\langle a_t | A_t \rangle = \alpha A_t + \beta$ .

676 In the spike recordings analyzed in this study, the states of a subset of neurons are observed  
 677 by placing electrodes that record the activity of the same set of neurons over the entire record-  
 678 ing. This implementation of subsampling translates to the general definition in the following  
 679 manner: If  $n$  out of all  $N$  neurons are sampled, the probability to sample  $a_t$  active neurons out  
 680 of the actual  $A_t$  active neurons follows a hypergeometric distribution,  $a_t \sim \text{Hyp}(N, n, A_t)$ . As  
 681  $\langle a_t | A_t = j \rangle = jn / N$ , this representation satisfies the mathematical definition of subsam-  
 682 pling with  $\alpha = n / N$ . Choosing this special implementation of subsampling allows to derive  
 683 predictions for the Fano factor under subsampling and the spike count cross correlation. First,  
 684 evaluate  $\text{Var}[a_t]$  further in terms of  $A_t$ :

$$\begin{aligned} \text{Var}[a_t] &= \langle \text{Var}[a_t | A_t] \rangle + \text{Var}[\langle a_t | A_t \rangle] \\ &= n \left\langle \frac{A_t}{N} \frac{N - A_t}{N} \frac{N - n}{N - 1} \right\rangle + \text{Var}\left[\frac{n}{N} A_t\right] \\ &= \frac{1}{N} \frac{n}{N} \frac{N - n}{N - 1} (N \langle A_t \rangle - \langle A_t^2 \rangle) + \frac{n^2}{N^2} \text{Var}[A_t] \\ &= \frac{n}{N^2} \frac{N - n}{N - 1} (N \langle A_t \rangle - \langle A_t^2 \rangle) + \left( \frac{n^2}{N^2} - \frac{n}{N^2} \frac{N - n}{N - 1} \right) \text{Var}[A_t]. \end{aligned} \quad (\text{S6})$$

685 This expression precisely determines the variance  $\text{Var}[a_t]$  under subsampling from the proper-  
 686 ties  $\langle A_t \rangle$  and  $\text{Var}[A_t]$  of the full process, and from the parameters of subsampling  $n$  and  $N$ . We  
 687 now show that the Fano factor approaches and even falls below unity under strong subsampling,  
 688 regardless of the underlying dynamical state  $m$ . In the limit of strong subsampling ( $n \ll N$ ) Eq.  
 689 (S6) yields:

$$\text{Var}[a_t] \approx \frac{n}{N^2} (N\langle A_t \rangle - \langle A_t \rangle^2) + \frac{n^2 - n}{N^2} \text{Var}[A_t]. \quad (\text{S7})$$

690 Hence the subsampled Fano factor is given by

$$F_{a_t} = \frac{\text{Var}[a_t]}{\langle a_t \rangle} \approx 1 - \frac{\langle A_t \rangle}{N} + \frac{n-1}{N} \frac{\text{Var}[A_t]}{\langle A_t \rangle} = 1 - \frac{\langle A_t \rangle - (n-1)F_{A_t}}{N}. \quad (\text{S8})$$

691 Interestingly, when sampling a single unit ( $n = 1$ ) the Fano factor of that unit becomes com-  
692 pletely independent of the Fano factor of the full process:

$$F_{a_t} = 1 - \langle A_t \rangle / N = 1 - \langle a_t \rangle / n = 1 - R, \quad (\text{S9})$$

693 where  $R = \langle a_t \rangle / n$  is the mean rate of a single unit.

694 Based on this implementation of subsampling, we derived analytical results for the cross-  
695 correlation between the activity of two units on the time scale of one time step. The pair of  
696 units is here represented by two independent samplings  $a_t$  and  $\tilde{a}(t)$  of a BP  $A_t$  with  $n = 1$ ,  
697 i.e. each represents one single unit. Because both samplings are drawn from identical distri-  
698 butions, their variances are identical and hence the correlation coefficient is given by  $r_{\text{sc}} =$   
699  $\text{Cov}(a_t, \tilde{a}(t)) / \text{Var}[a_t]$ . Employing again the law of total expectation and using the indepen-  
700 dence of the two samplings, this can be evaluated:

$$\text{Cov}(a_t, \tilde{a}(t)) = \langle \langle a_t \tilde{a}(t) | A_t \rangle \rangle_{A_t} - \langle \langle a_t | A_t \rangle \rangle_{A_t}^2 = \frac{1}{N^2} \text{Var}[A_t], \quad (\text{S10})$$

with the first inner expectation being taken over the joint distribution of  $a_t$  and  $\tilde{a}(t)$ . Using Eq. (S7), one easily obtains

$$r_{\text{sc}} = \frac{\text{Var}[A_t]}{N\langle A_t \rangle - \langle A_t \rangle^2} = \frac{F_{A_t}}{N - \langle A_t \rangle} = \frac{F_{A_t}}{N(1 - R)} \quad (\text{S11})$$

701 with the mean single unit rate  $R = \langle A_t \rangle / N$ . For subcritical systems, the Fano factor  $F_{A_t}$   
702 is much smaller than  $N$ , and the rate is typically much smaller than 1. Therefore, the cross-  
703 correlation between single units is typically very small.

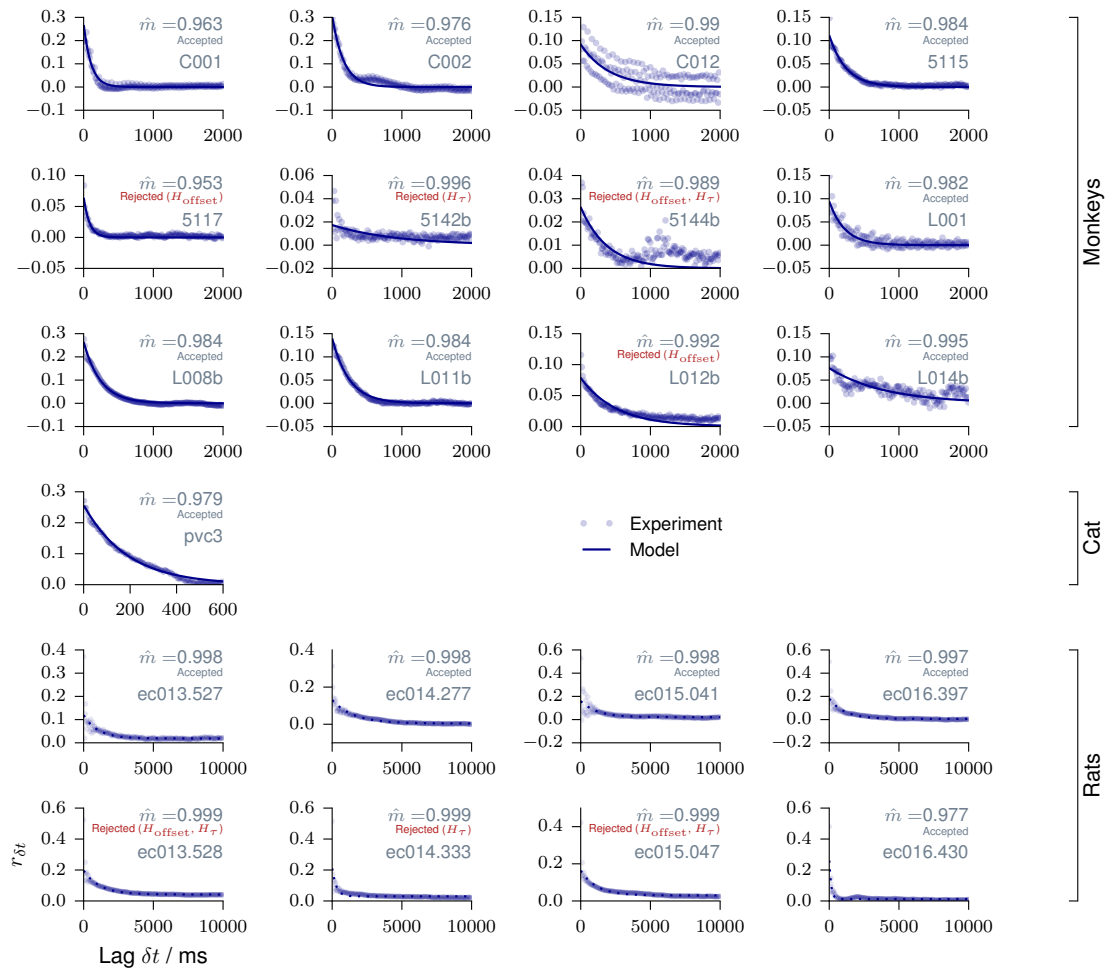

**FIGURE S1: MR estimation for individual recording sessions.** Reproduced from<sup>49</sup>. MR estimation is shown for every individual animal. The consistency checks are detailed in<sup>49</sup>. Data from monkey were recorded in prefrontal cortex during an working memory task. The third panel shows a oscillation of  $r_k$  with a frequency of 50 Hz, corresponding to measurement corruption due to power supply frequency. Data from anesthetized cat were recorded in primary visual cortex. Data from rat were recorded in hippocampus during a foraging task. In addition to a slow exponential decay, the slopes  $r_k$  show the  $\vartheta$ -oscillations of 6 – 10 Hz present in hippocampus.

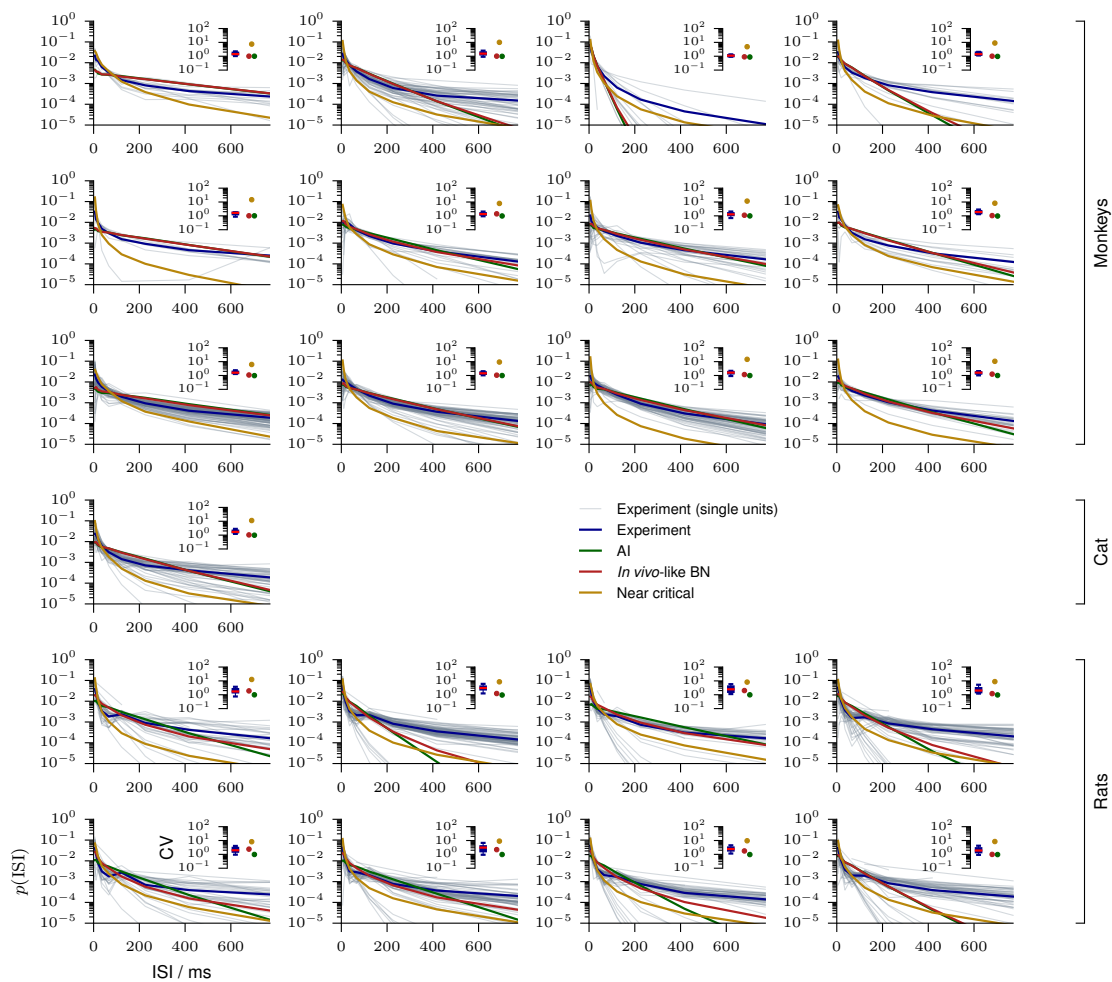

**FIGURE S2: Interspike interval distribution for individual recording sessions.** Interspike interval (ISI) distributions are shown for individual units of each recording (gray), for the average over units of each recording (blue), as well as for the matched models, either AI (green), *in vivo*-like (red), or near critical (yellow). The insets show the corresponding coefficients of variation (CV). For every experiment AI and *in vivo*-like models are virtually indistinguishable by the ISI distributions.

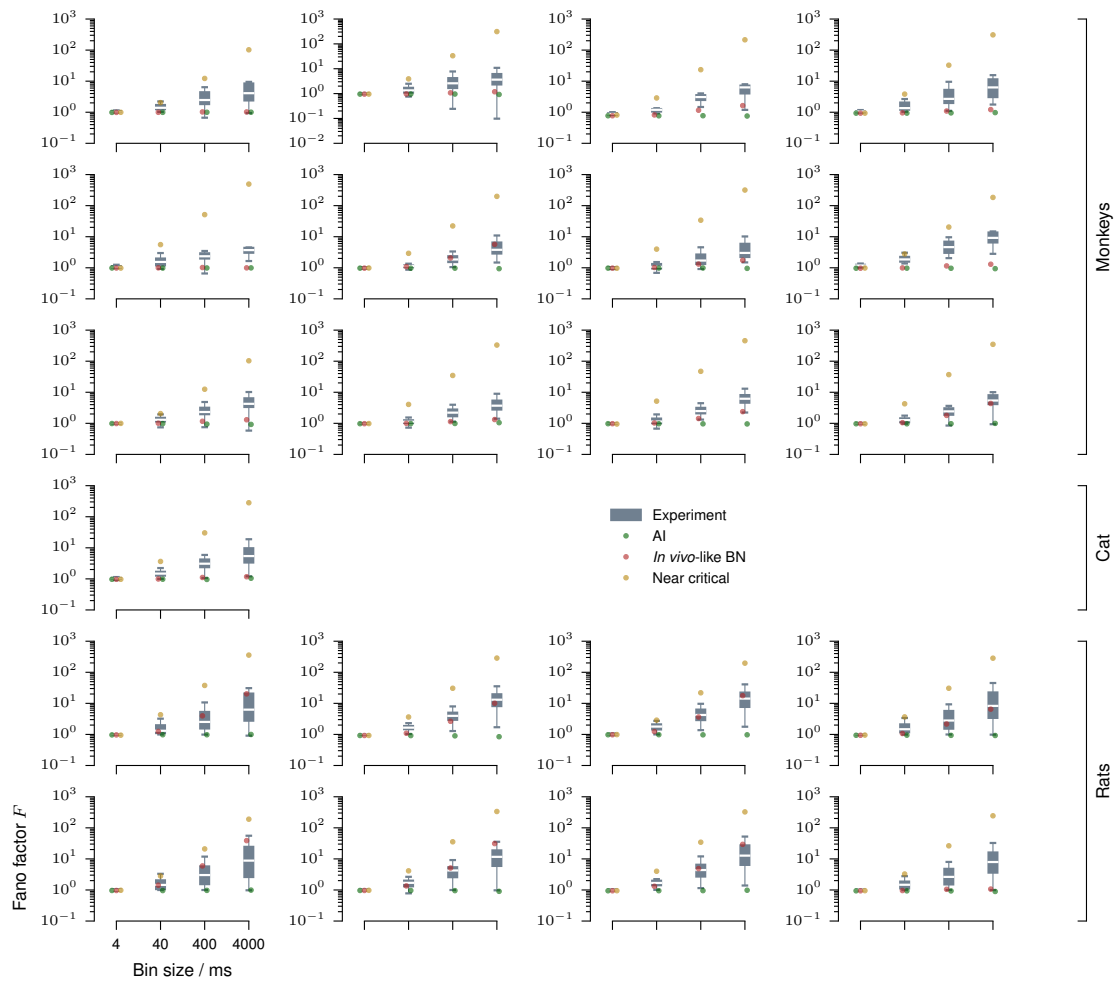

**FIGURE S3: Fano factors for individual recording sessions.** Fano factors are shown for individual single or multi units of every recording (gray boxplots, median / 25% – 75%, 2.5% – 97.5%), as well as for the matched models, either AI (green), *in vivo*-like (red), or near critical (yellow).



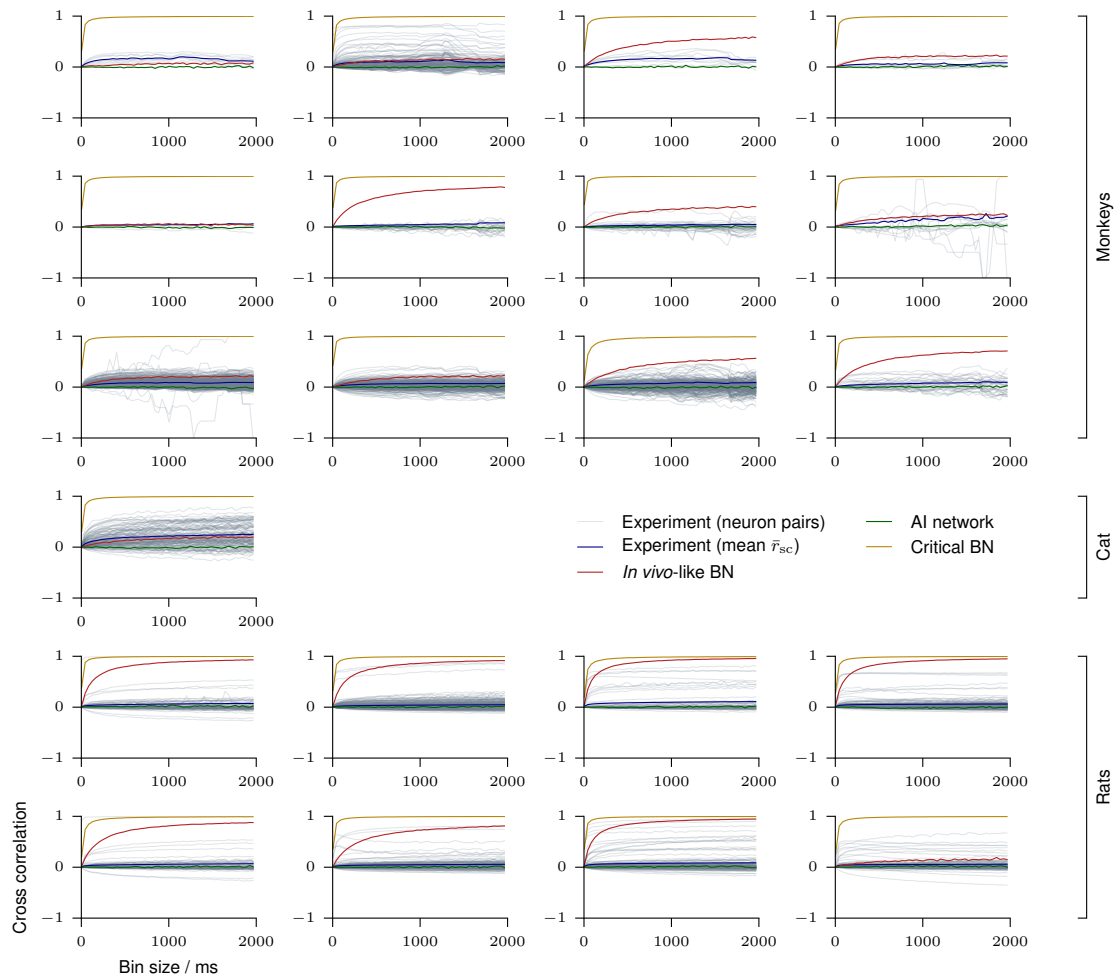

**FIGURE S4: Cross correlations for individual recording sessions.** Spike count cross correlations ( $r_{sc}$ ) are shown for every neuron pair (gray) and the ensemble average (blue) of each recording, for bin sizes from 1 ms to 2s. Cross correlations are also shown for the matched models, either AI (green), *in vivo*-like (red), or near critical (yellow).

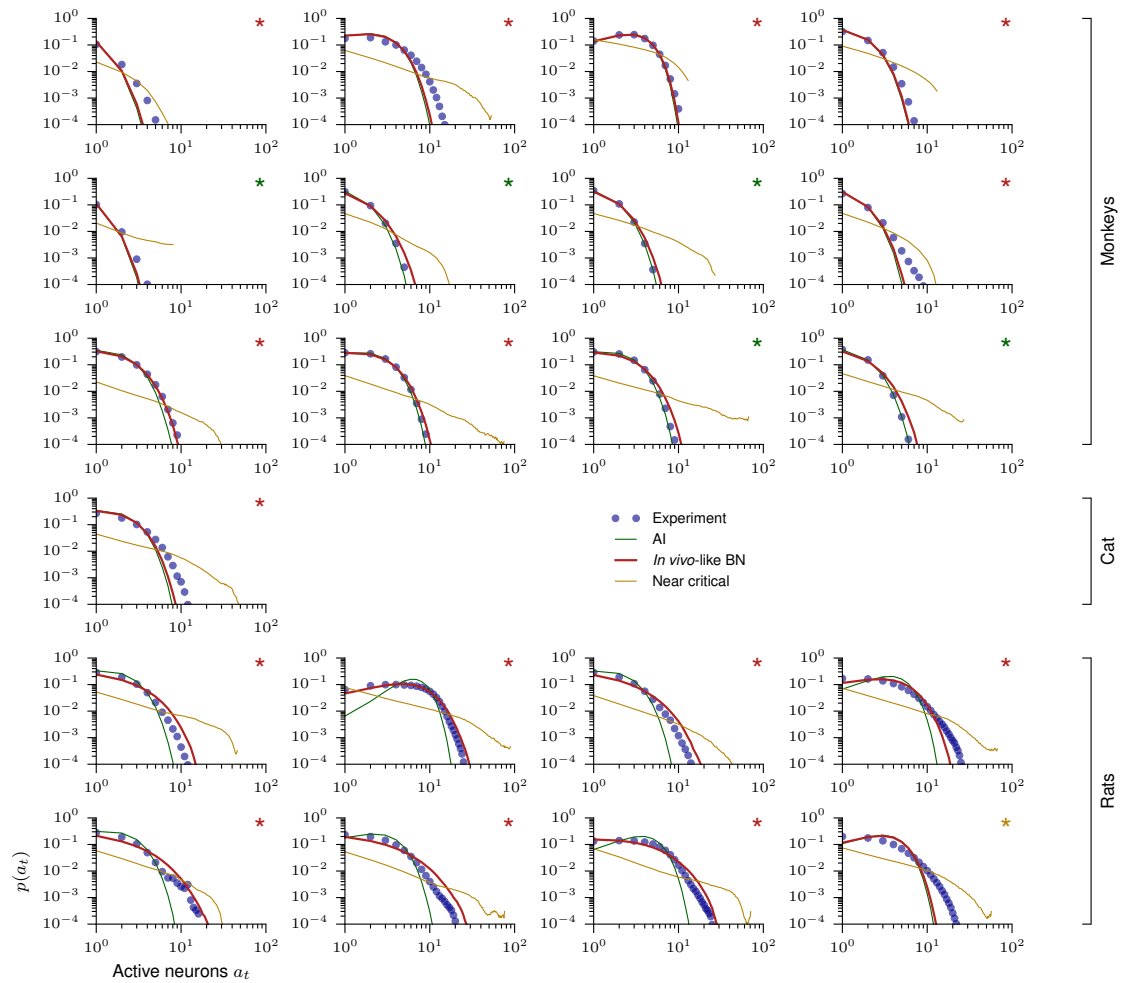

**FIGURE S5: Activity distributions (4 ms bin size).** Activity distributions are shown for every recording for a bin size of 4 ms (blue). Activity distributions for the matched models, either AI (green), *in vivo*-like (red), or near critical (yellow) are also shown. The color of the asterisk indicates which of the three models yielded the highest likelihood for the data following<sup>64</sup>.

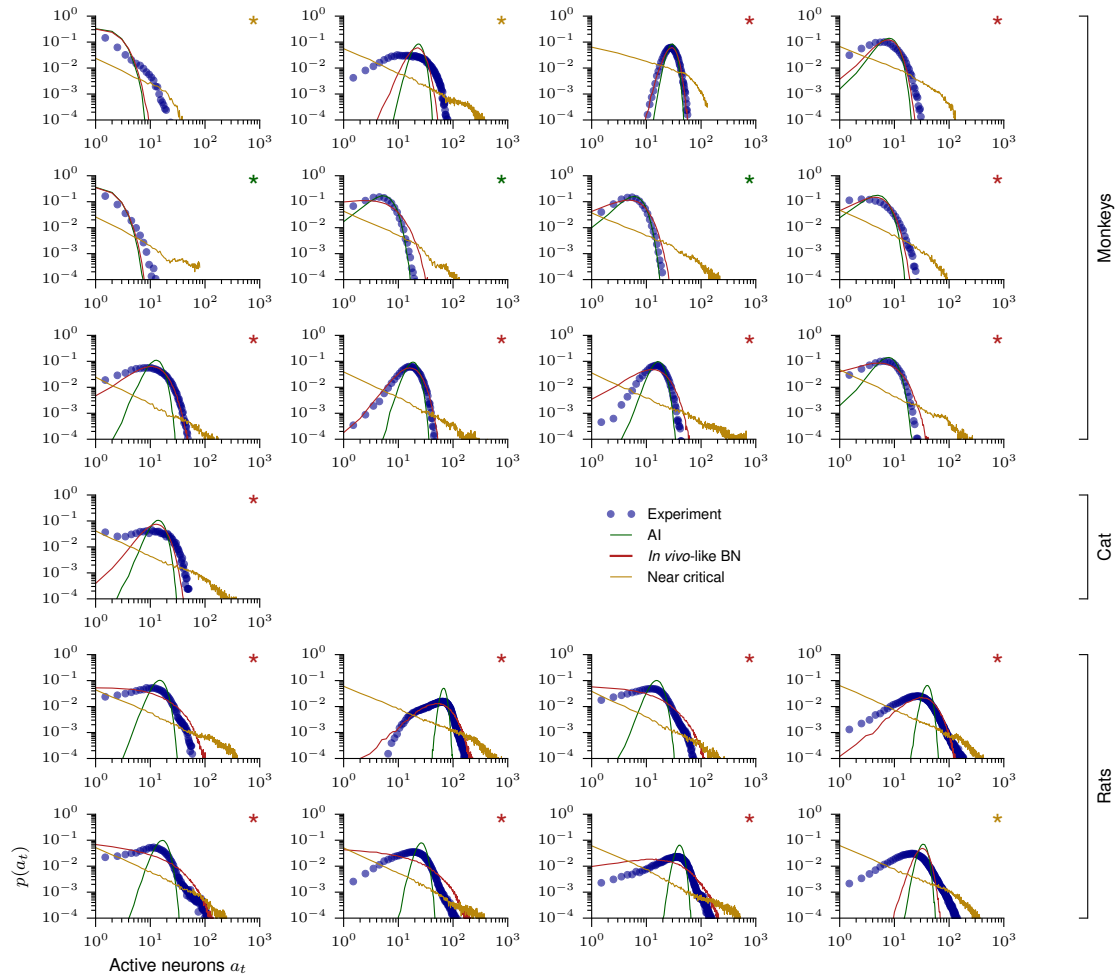

**FIGURE S6: Activity distributions (40 ms bin size).** Activity distributions are shown for every recording, for a bin size of 40 ms (blue). Activity distributions for the matched models, either AI (green), *in vivo*-like (red), or near critical (yellow) are also shown. The color of the asterisk indicates which of the three models yielded the highest likelihood for the data following<sup>64</sup>.

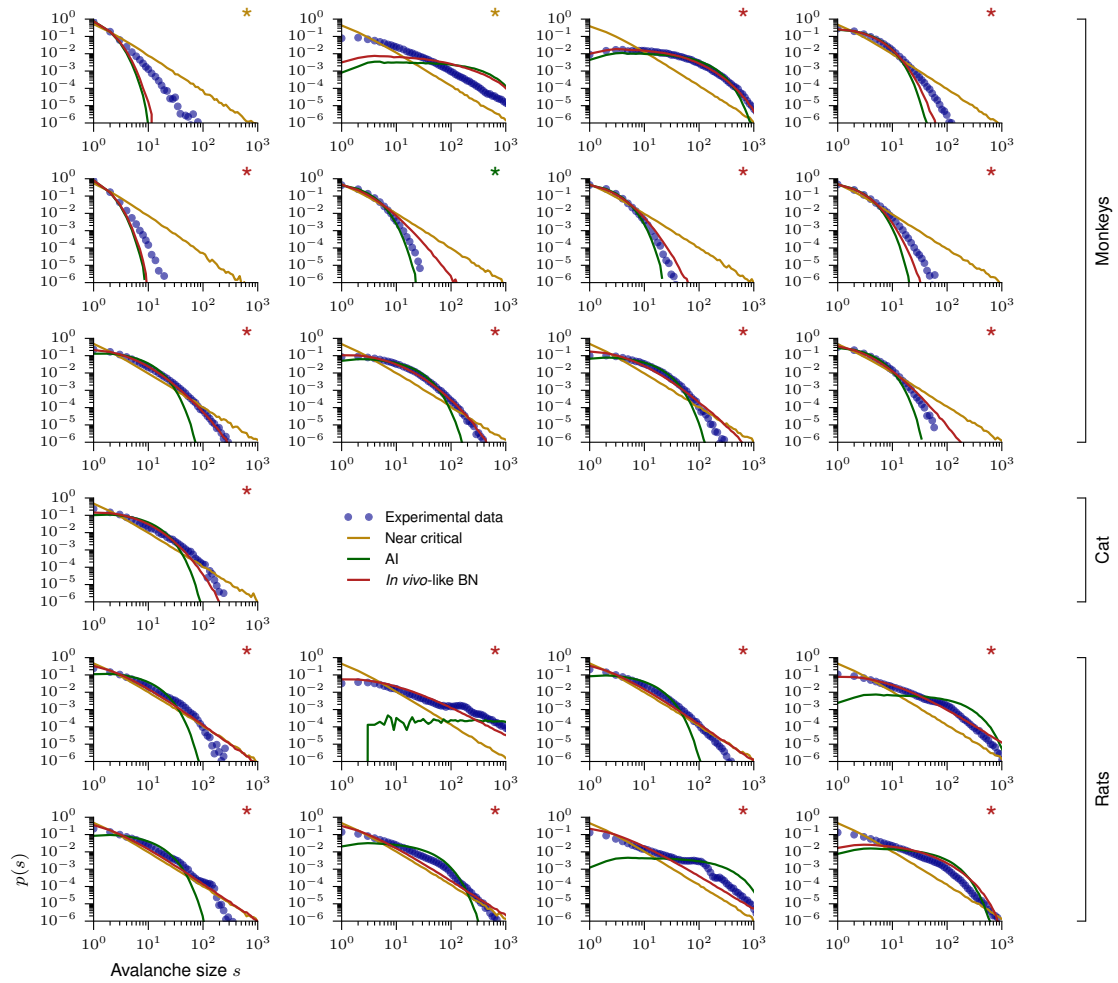

**FIGURE S7: Avalanche size distribution for individual recording sessions.** Avalanche size distributions are shown for every recording (blue) and for matched models, either AI (green), *in vivo*-like (red), or near critical (yellow). The color of the asterisk indicates which of the three models yielded the highest likelihood for the data following<sup>64</sup>.

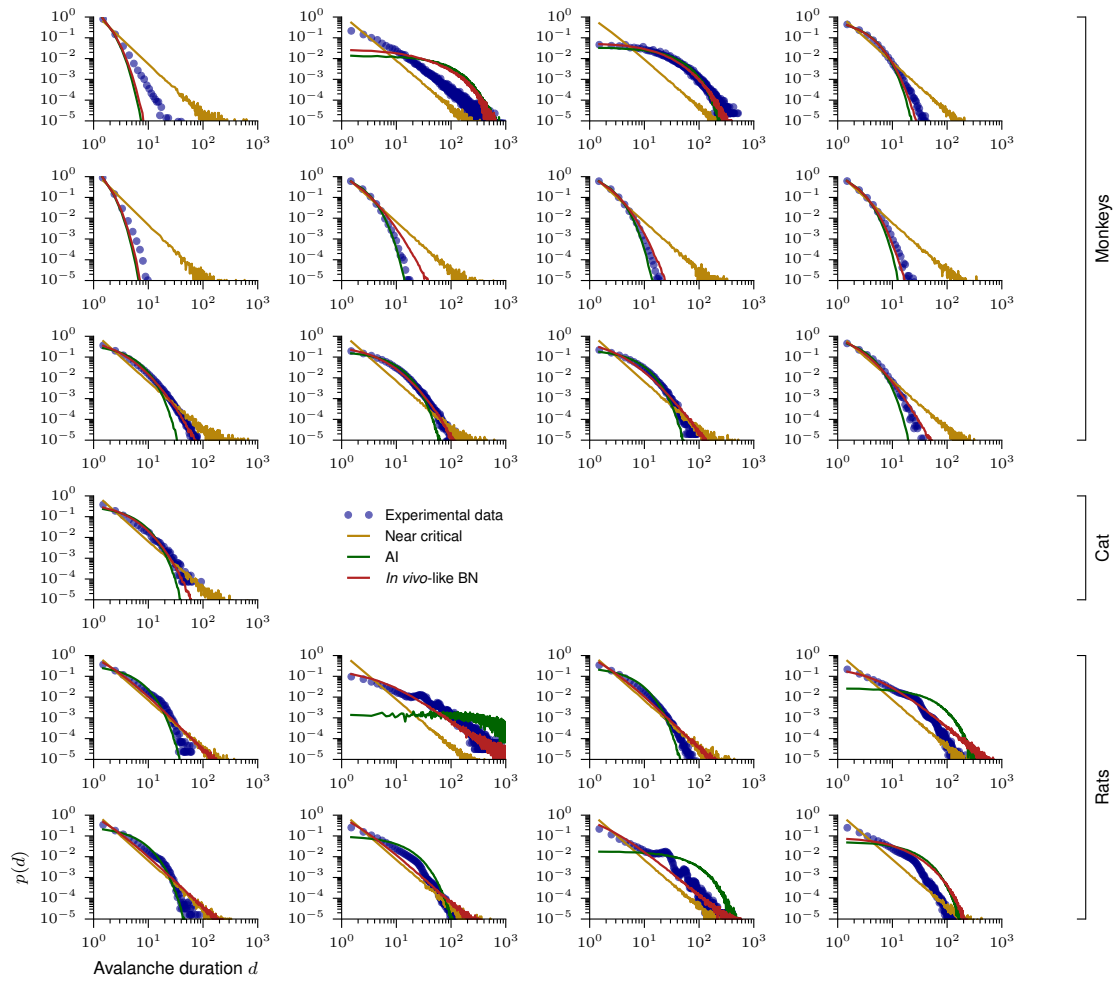

**FIGURE S8: Avalanche duration distribution for individual recording sessions.** Avalanche duration distributions are shown for every recording (blue) and for matched models, either AI (green), *in vivo*-like (red), or near critical (yellow).

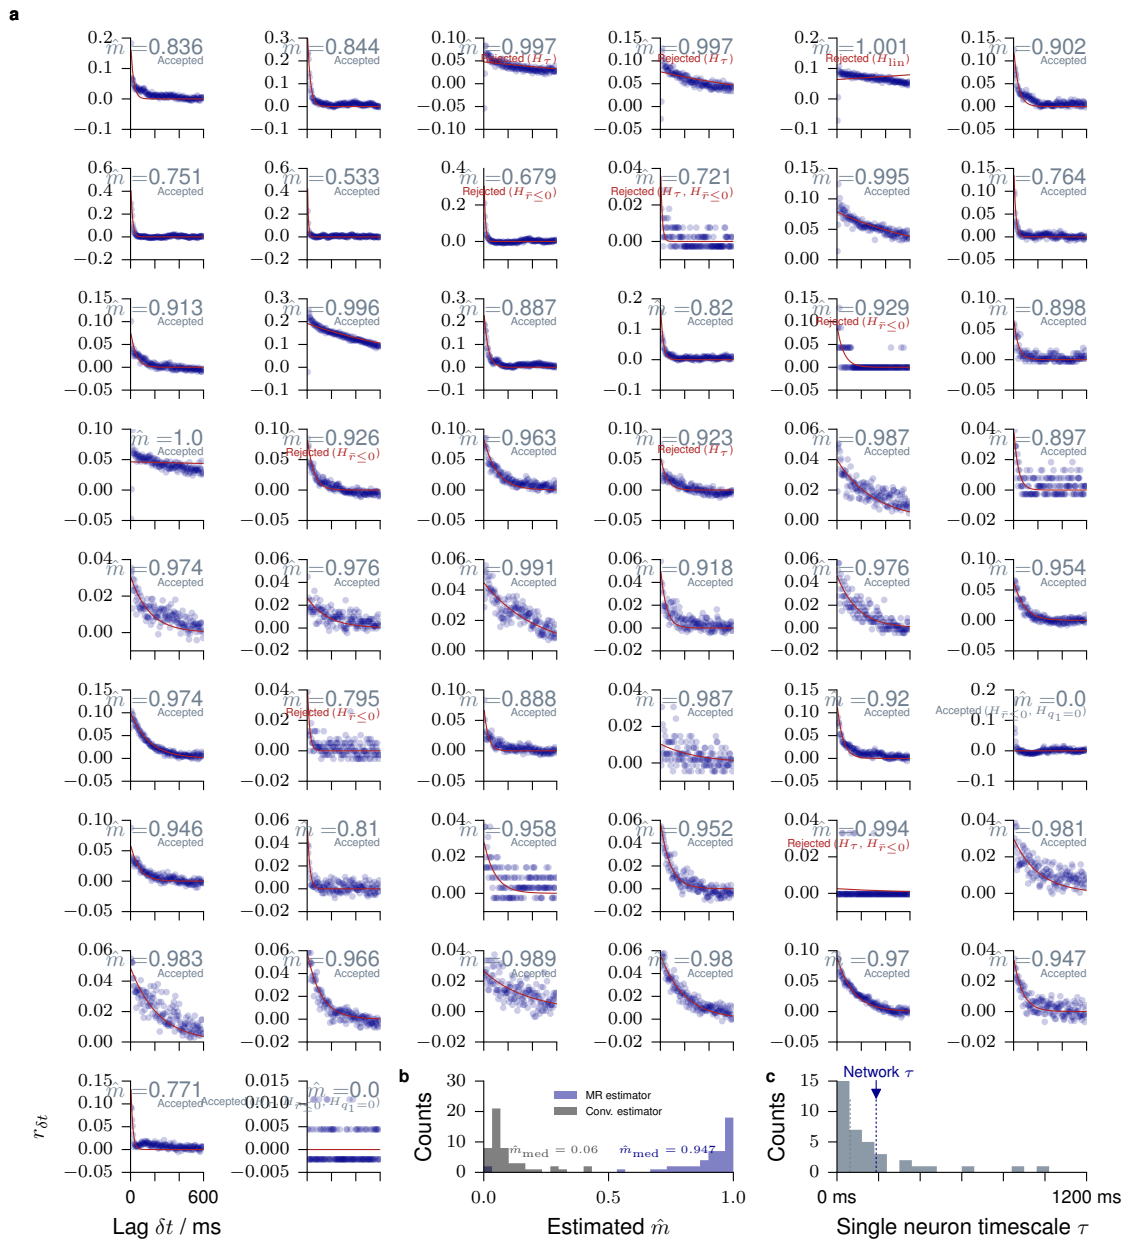

**FIGURE S9: MR estimation from single neuron activity (cat).** Modified from<sup>49</sup>. MR estimation is used to estimate  $\hat{m}$  from the activity  $a_t$  of a single units in cat visual cortex. **a.** Each panel shows MR estimation for one of the 50 recorded units. Autocorrelations decay rapidly in some units, but long-term correlations are present in the activity of most units. The consistency checks are detailed in<sup>49</sup>. **b.** Histogram of the single unit branching ratios  $\hat{m}$ , inferred with the conventional estimator and using MR estimation. The difference between these estimates demonstrates the subsampling bias of the conventional estimator, and how it is overcome by MR estimation. **c.** Histogram of single unit timescales with their median (gray dotted line) and the timescale of the dynamics of the whole network (blue dotted line).

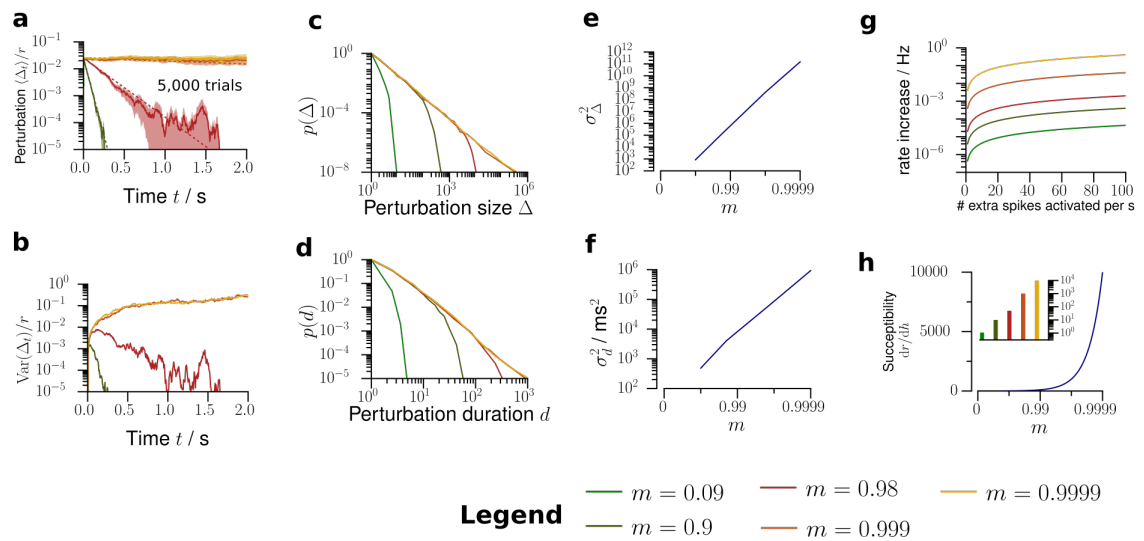

**FIGURE S10: Further predictions about network activity.** **a.** The model predicts that the perturbation decays exponentially with decay time  $\tau = -\Delta t / \log m$ . **b.** The variance across trials of the perturbed firing rate has a maximum, whose position depends on  $m$ . **c.** Depending on  $m$ , the model predicts the distributions for the total number of extra spikes  $\Delta$  generated by the network following a single extra spike. **d.** Likewise, the model predicts distributions of the duration  $d$  of these perturbations. **e.** Variance of the total perturbation size as a function of  $m$ . **f.** Variance of the total perturbation duration as a function of  $m$ . **g.** Increase of the network firing rate as a function of the rate of extra neuron activations for different  $m$ . **h.** Amplification (susceptibility)  $dr/dh$  of the network as a function of the branching ratio  $m$ .
